# Supplementary material for: Litoralimycins A and B, New Cytotoxic Thiopeptides from Streptomonospora sp. M2
Source: PubMed Central journal article supplement (PMC7345755; doi:10.3390/md18060280), 2020-05-26
Supplement: marinedrugs-18-00280-s001.pdf [file marinedrugs-18-00280-s001.pdf]

Article

# Litoralimycins A and B, new cytotoxic thiopeptides from *Streptomonospora* sp. M2

Shadi Khodamoradi <sup>1,2</sup>, Marc Stadler <sup>2,3</sup>, Joachim Wink <sup>1,2,\*</sup> and Frank Surup <sup>2,3,\*</sup>

- <sup>1</sup> Microbial strain collection, Helmholtz-Centre for Infection Research (HZI), Inhoffenstr. 7, 38124 Braunschweig, Germany; [shadi.khodamoradi@helmholtz-hzi.de](mailto:shadi.khodamoradi@helmholtz-hzi.de), [joachim.wink@helmholtz-hzi.de](mailto:joachim.wink@helmholtz-hzi.de).
  - <sup>2</sup> German Centre for Infection Research (DZIF), partner site Hannover-Braunschweig, 38124 Braunschweig, Germany.
  - <sup>3</sup> Microbial Drugs Department, Helmholtz-Centre for Infection Research (HZI), Inhoffenstr. 7, 38124 Braunschweig, Germany; [marc.stadlerp@helmholtz-hzi.de](mailto:marc.stadlerp@helmholtz-hzi.de), [frank.surup@helmholtz-hzi.de](mailto:frank.surup@helmholtz-hzi.de).
- \* Correspondence: [joachim.wink@helmholtz-hzi.de](mailto:joachim.wink@helmholtz-hzi.de) (biology), [frank.surup@helmholtz-hzi.de](mailto:frank.surup@helmholtz-hzi.de) (chemistry); Tel.: +49-351-6181-4223 (J.W.), +49-351-6181-4256 (F.S.)

-----Supporting Information-----

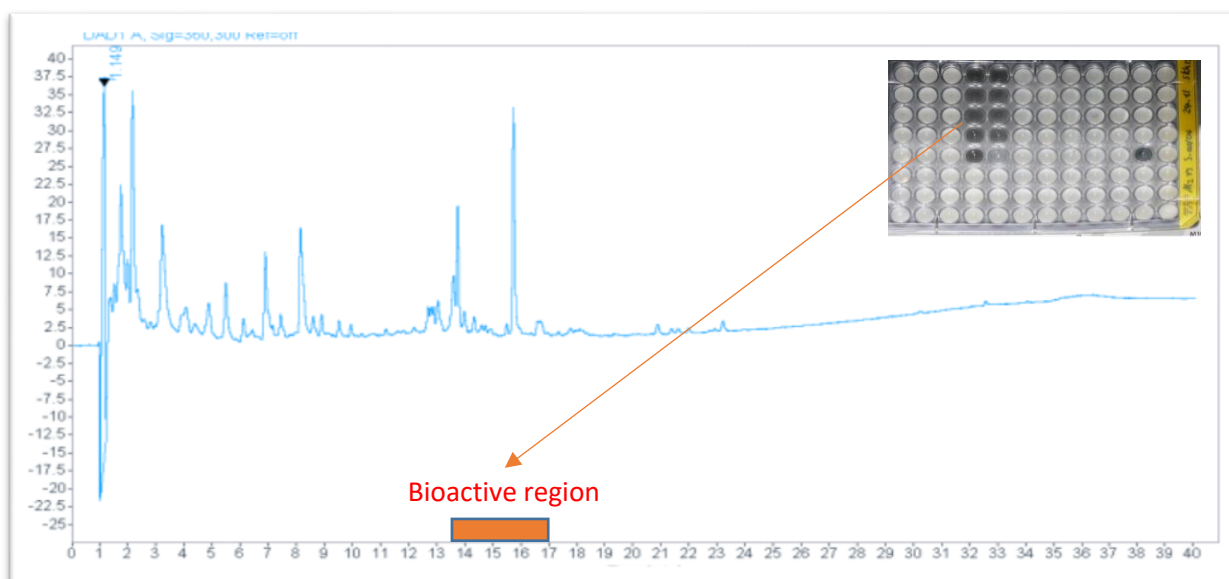

Figure S1: Fractionation analysis of *Streptomonospora* sp. M2 crude extract.

By fractionation of 5 $\mu$ L *Streptomonospora* sp. M2 crude extract (100x concentrated in methanol compared to culture volume) the reproducible growth inhibition of test organism *Staphylococcus aureus* was caused in wells D5 till E4, which had been collected from 13.5 to 17 minutes by HPLC fractionation.

Table S1. Antimicrobial activity of **1** and **2** versus different Gram-positive and Gram negative bacteria, fungal and yeast. n.i: no inhibition, T: Tetracycline, G: Gentamycin, N: Nystatin, K: Kanamycin

| Test organisms                               | compound 1 | comound 2 | Ref G-K-N-T |
|----------------------------------------------|------------|-----------|-------------|
| <i>Bacillus subtilis</i> DSM10 <sup>T</sup>  | 66.7       | 66.7      | 16.6 T      |
| <i>Staphylococcus aureus</i> Newman          | 66.7       | 66.7      | 1.02 G      |
| <i>Escherichia coli</i> WT BW25113           | n.i        | n.i       | 1.02 G      |
| <i>Escherichia coli</i> <i>acrB</i> JW0451-2 | n.i        | n.i       | 1.02 G      |
| <i>Pseudomonas aeruginosa</i> PA14           | n.i        | n.i       | 1.2 G       |
| <i>Acinetobacter baumannii</i>               | n.i        | n.i       | 1.2 G       |
| <i>Citrobacter freundii</i> DSM 30039        | n.i        | n.i       | 1.02 G      |
| <i>Mycobact semegmatic</i> ATCC700084        | n.i        | n.i       | 4.1 K       |
| <i>Mucor himalis</i> DSM 2656 T              | n.i        | n.i       | 16.6 N      |
| <i>Candida albicans</i> DSM1665              | n.i        | n.i       | 33.35 N     |
| <i>Pichia anomala</i> DSM6766                | n.i        | n.i       | 33.35 N     |

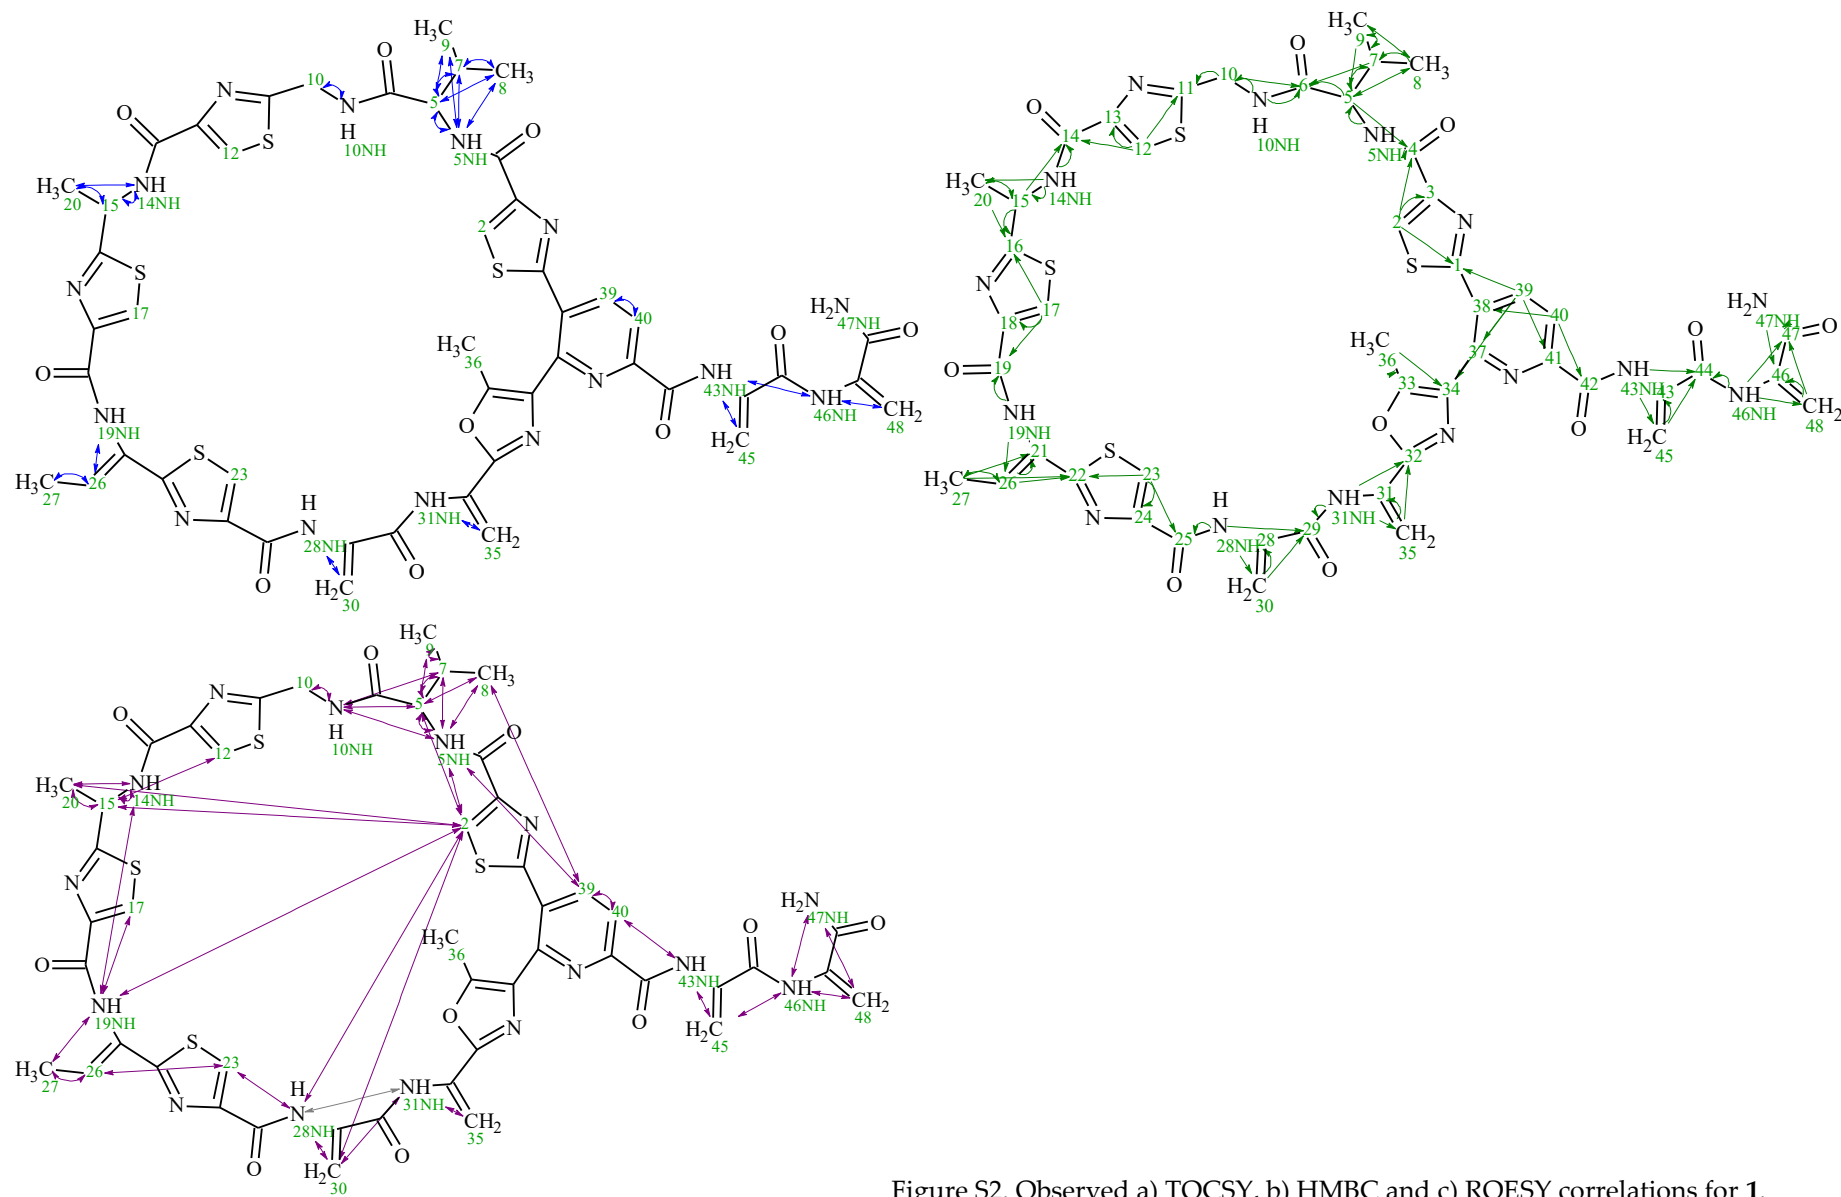

Figure S2. Observed a) TOCSY, b) HMBC and c) ROESY correlations for 1.

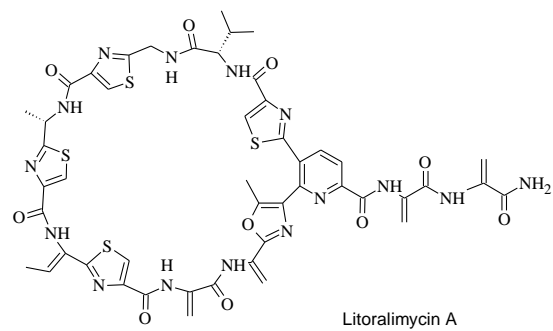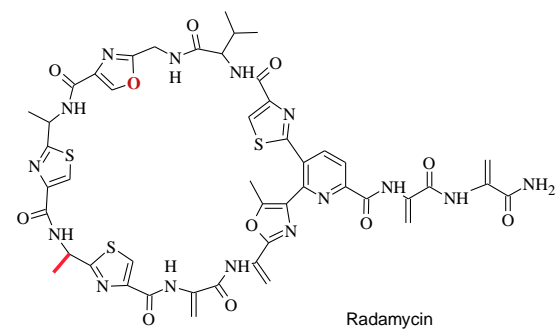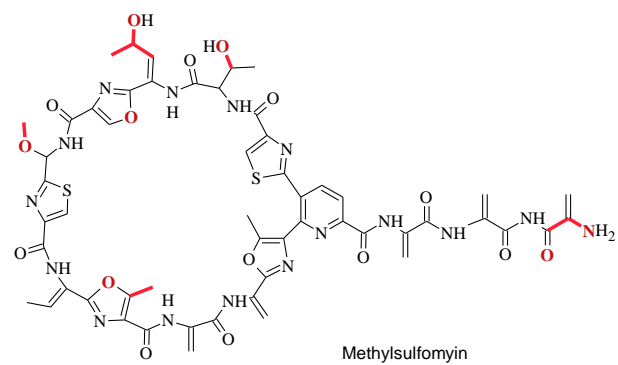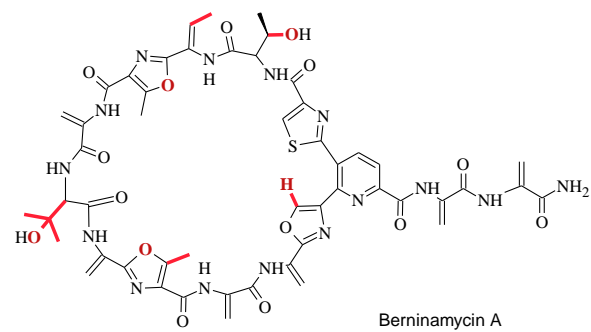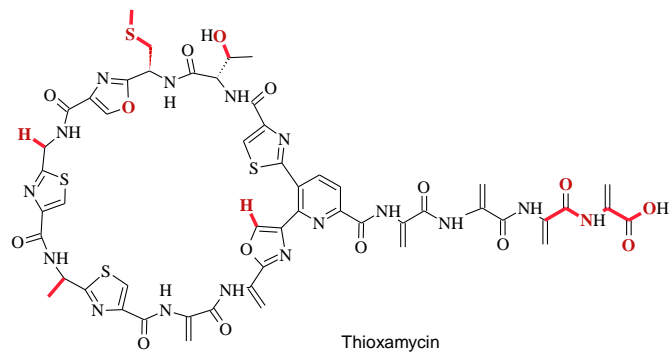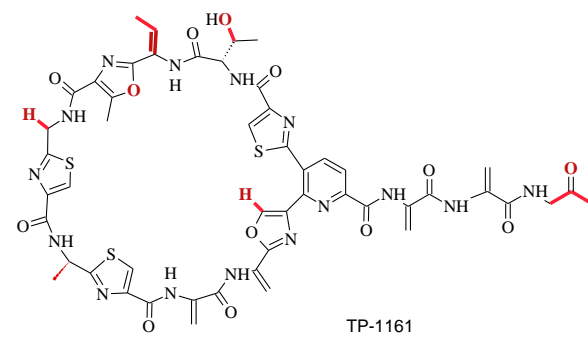

Figure S3. Known compounds structurally related to litoralimycins. Differences to **1** are highlighted in bold red.

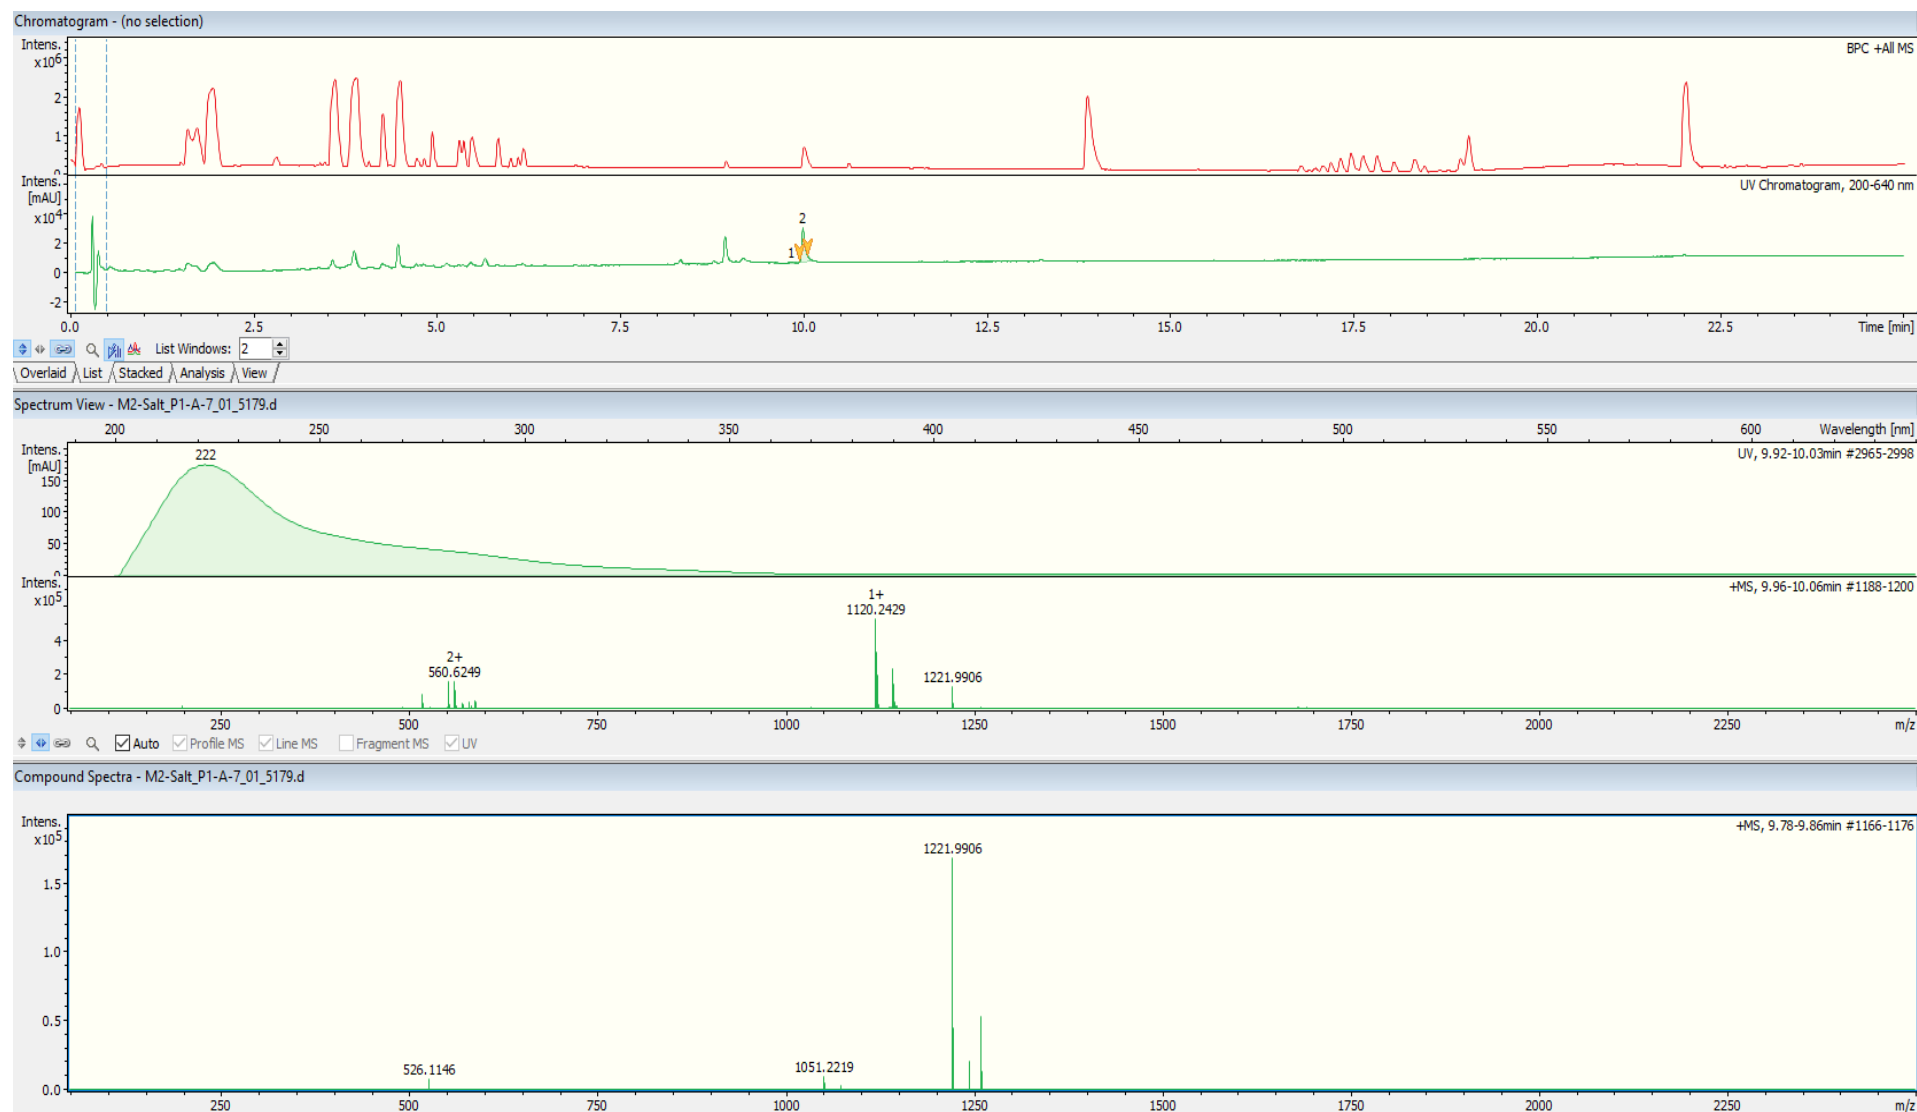

Figure S4: HPLC-MS (basepeak) and UV/Vis (200-640nm) chromatograms of a crude extract of *Streptomonospora* sp. M2 and HRESIMS data of litoralimycin A (1, middle) and B (2, bottom).

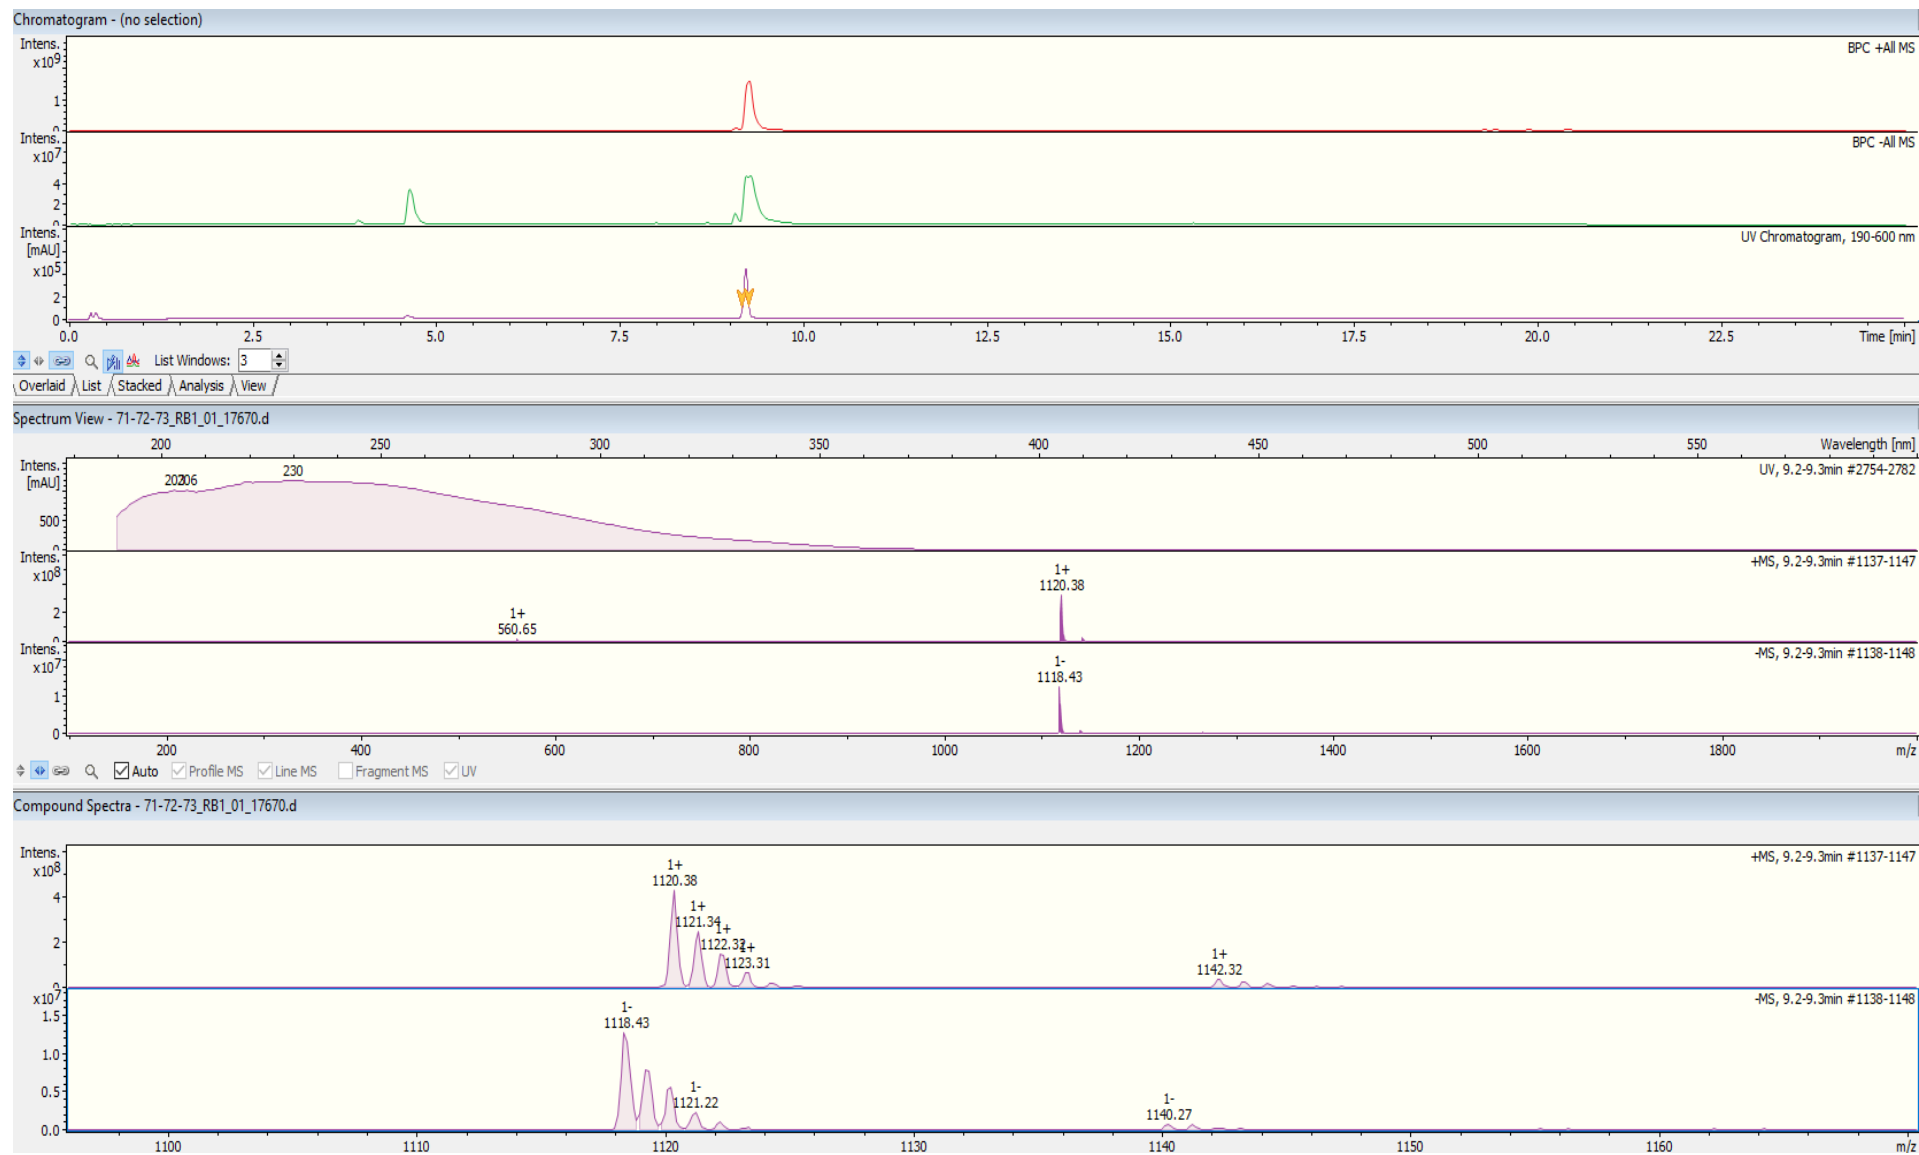

Figure S5: HPLC-ESIMS spectrum of litoralimycin A (1).

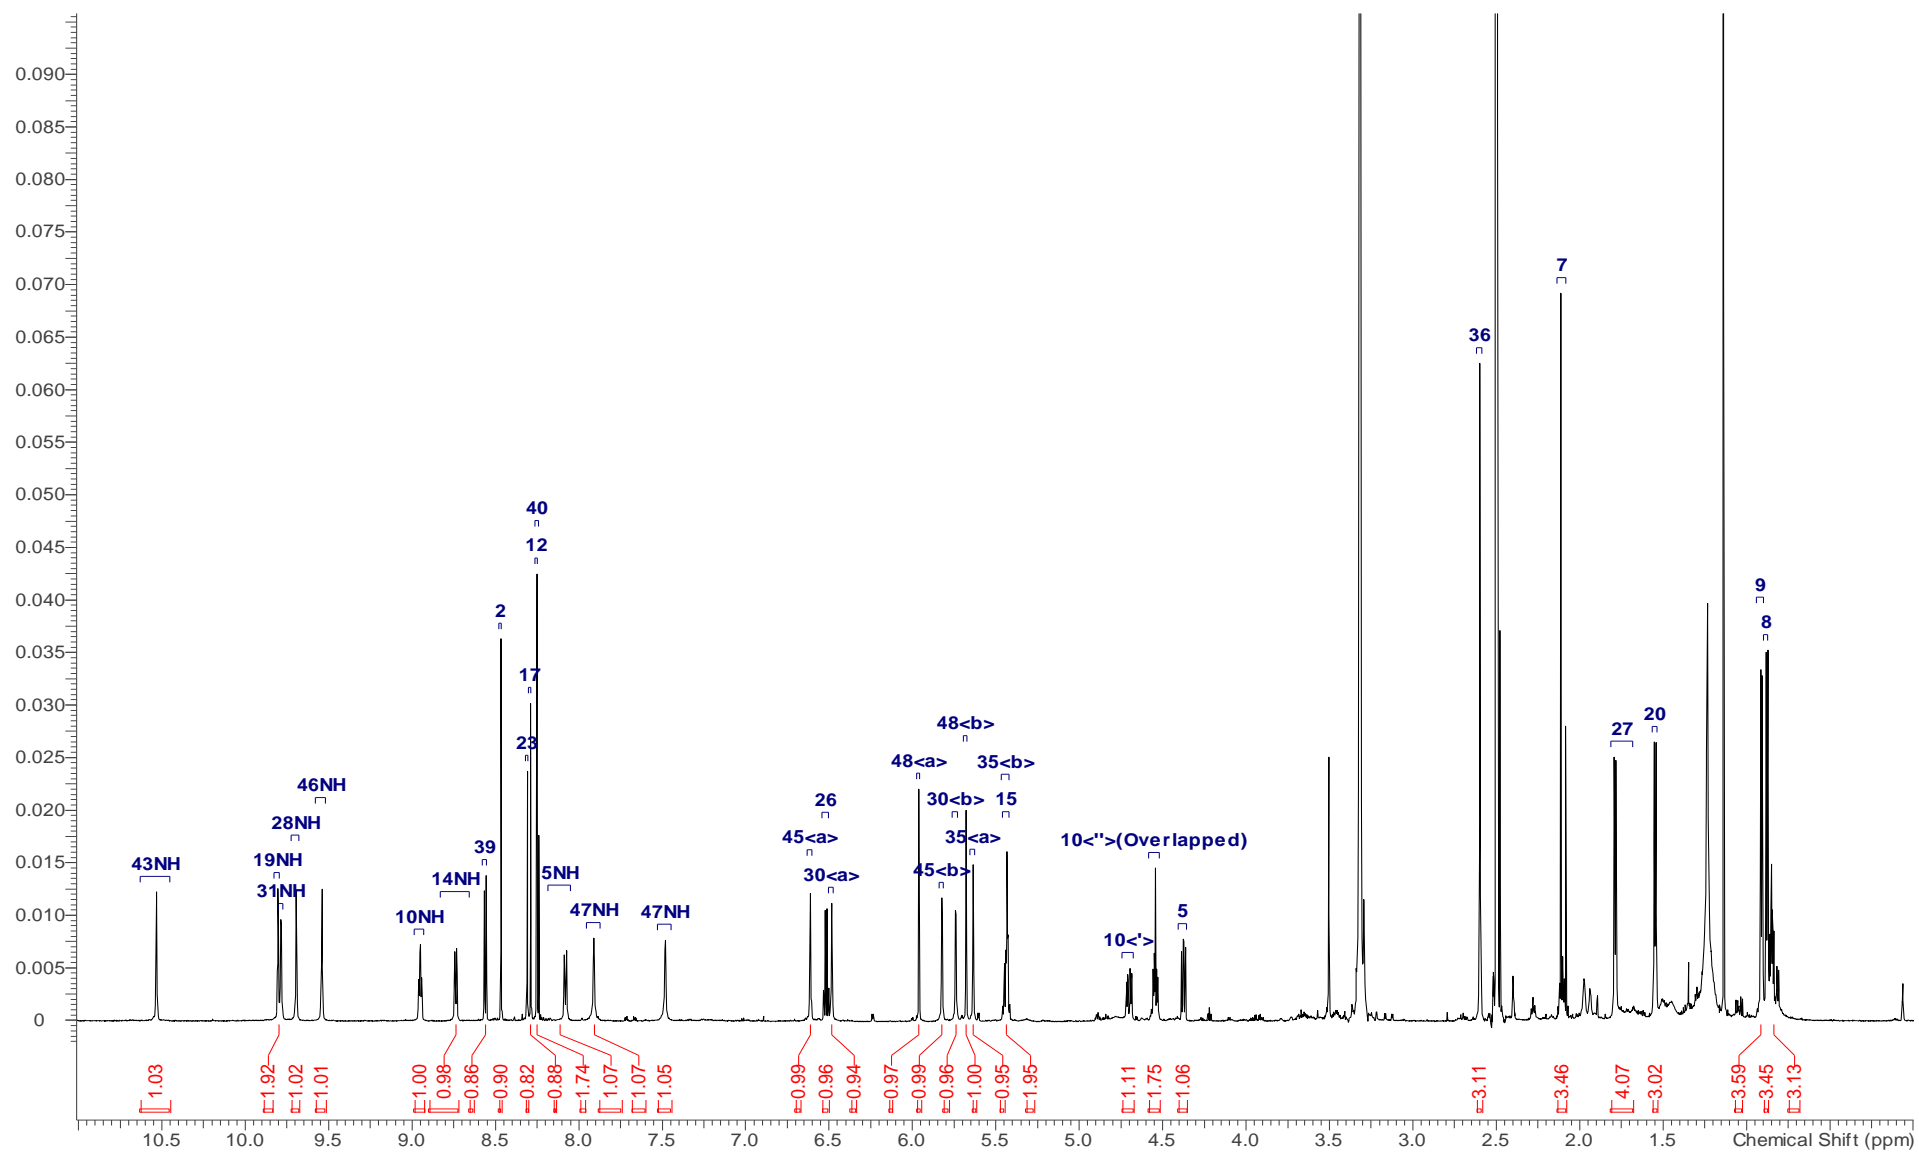

Figure S6:  $^1\text{H}$  NMR spectrum (700 MHz,  $\text{DMSO}-d_6$ ) of litoralimycin A (1).

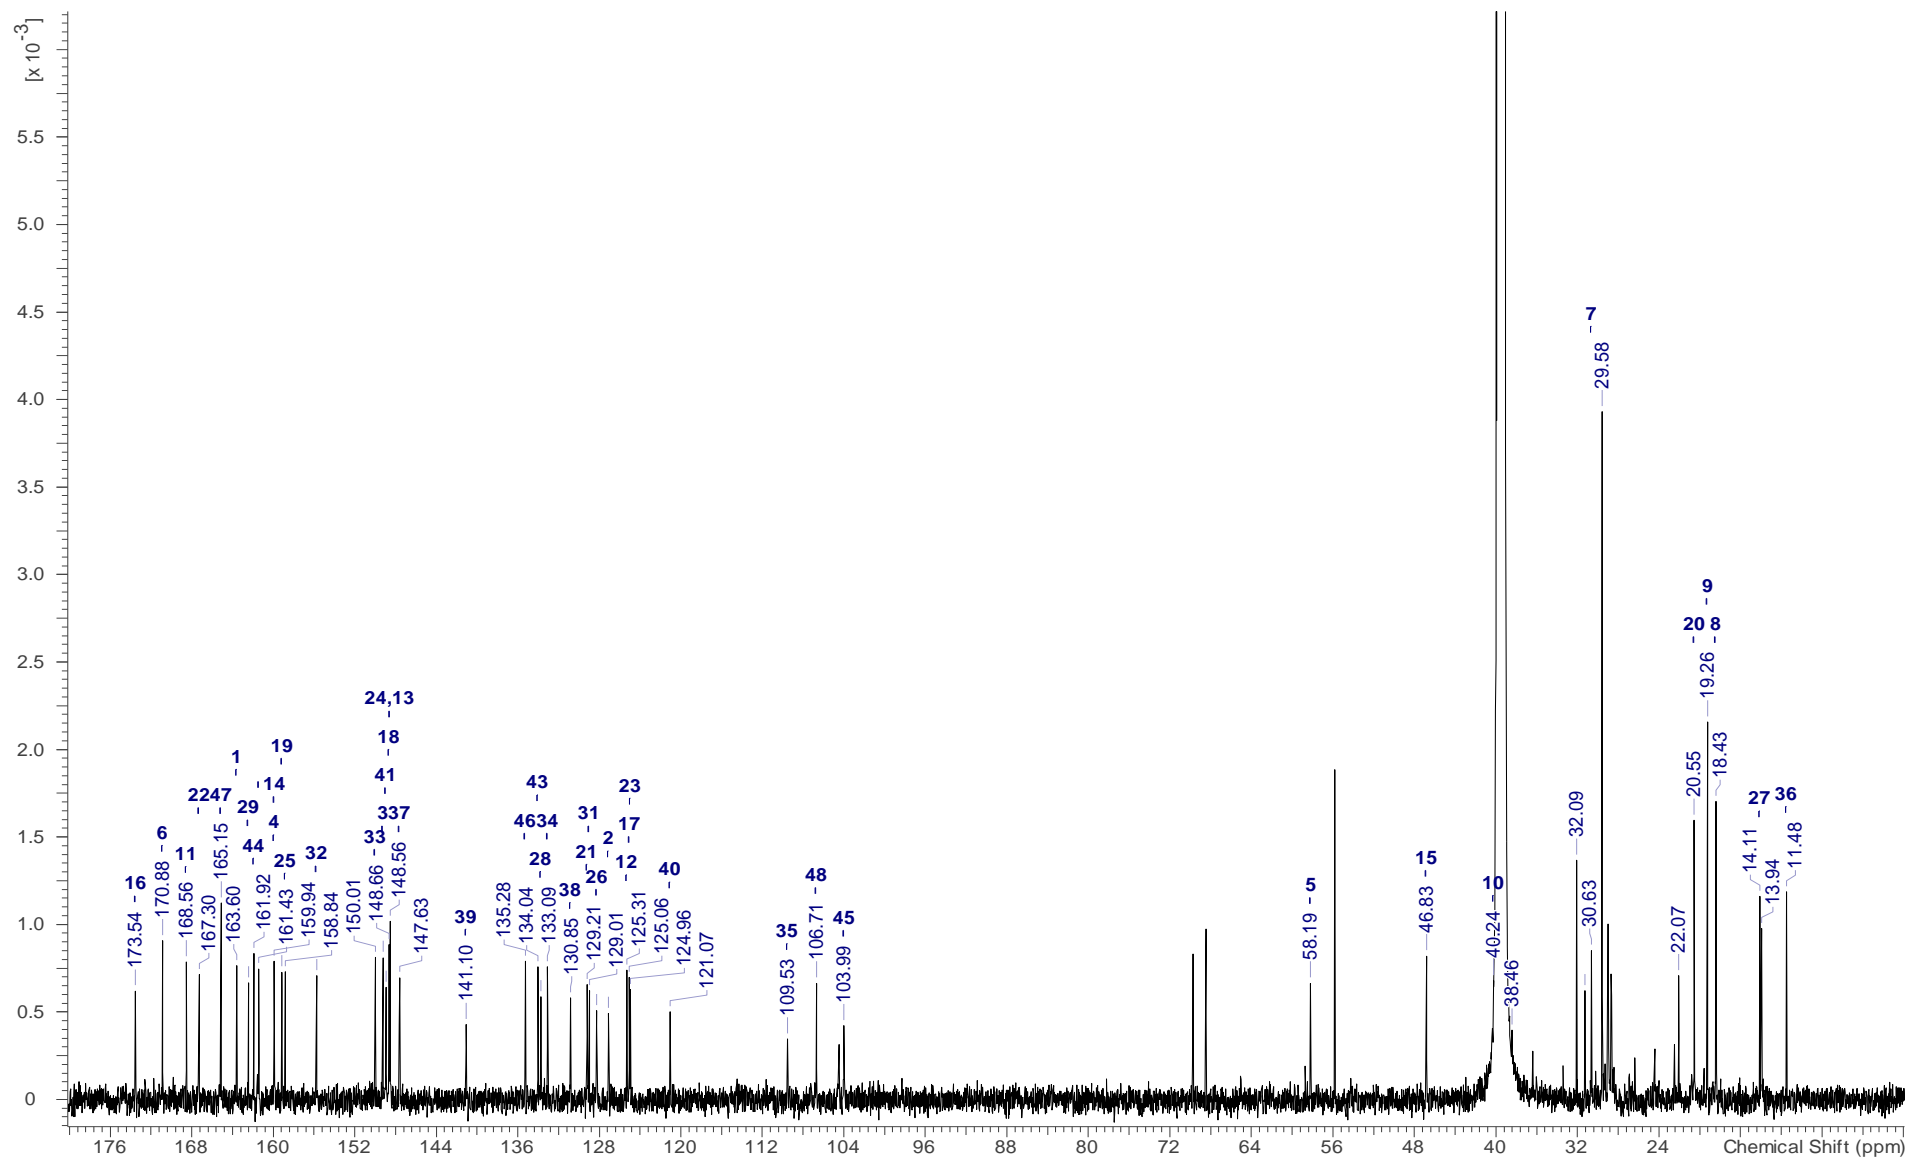

Figure S7:  $^{13}\text{C}$  NMR spectrum (175 MHz,  $\text{DMSO-}d_6$ ) of litoralimycin A (1).



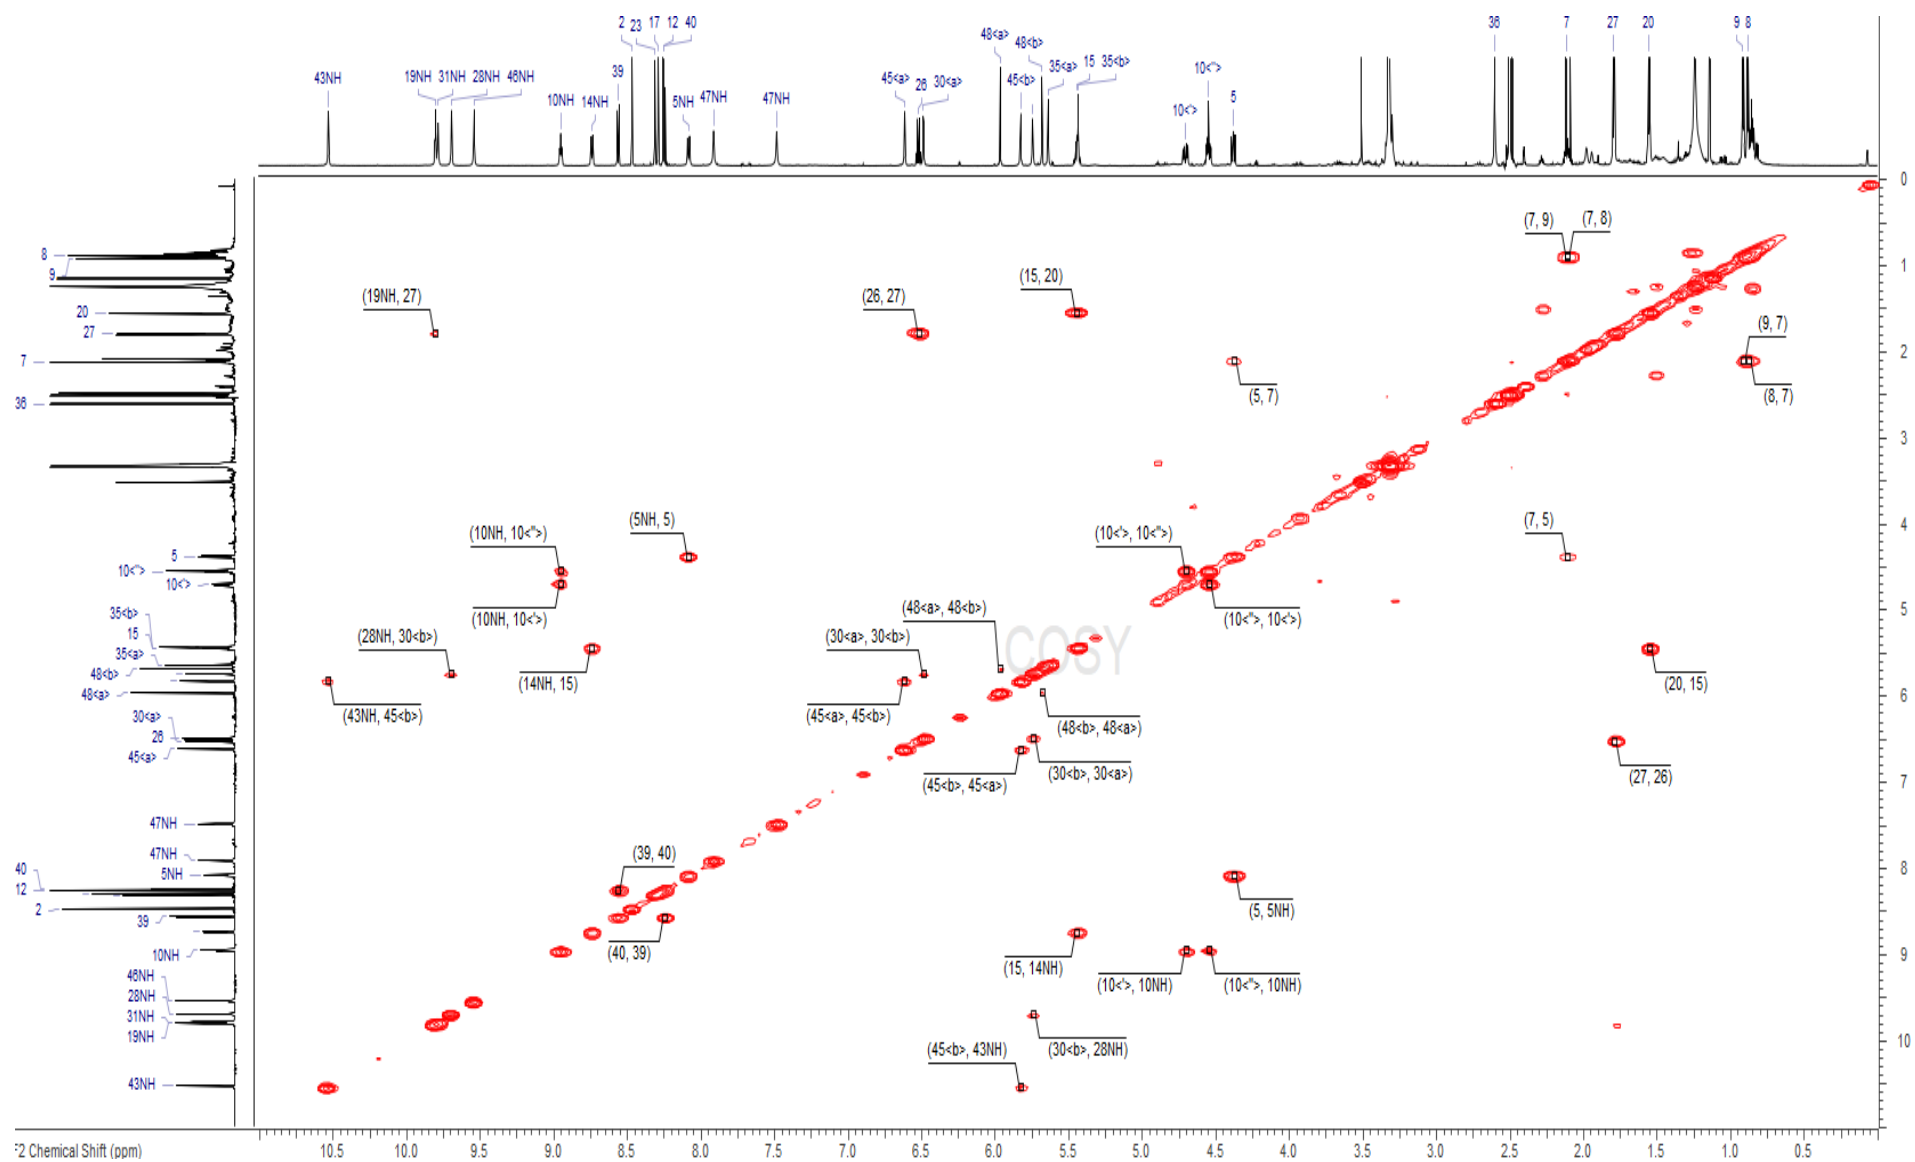

Figure S8: COSY NMR spectrum (700 MHz, DMSO-*d*<sub>6</sub>) of litoralimycin A (1).



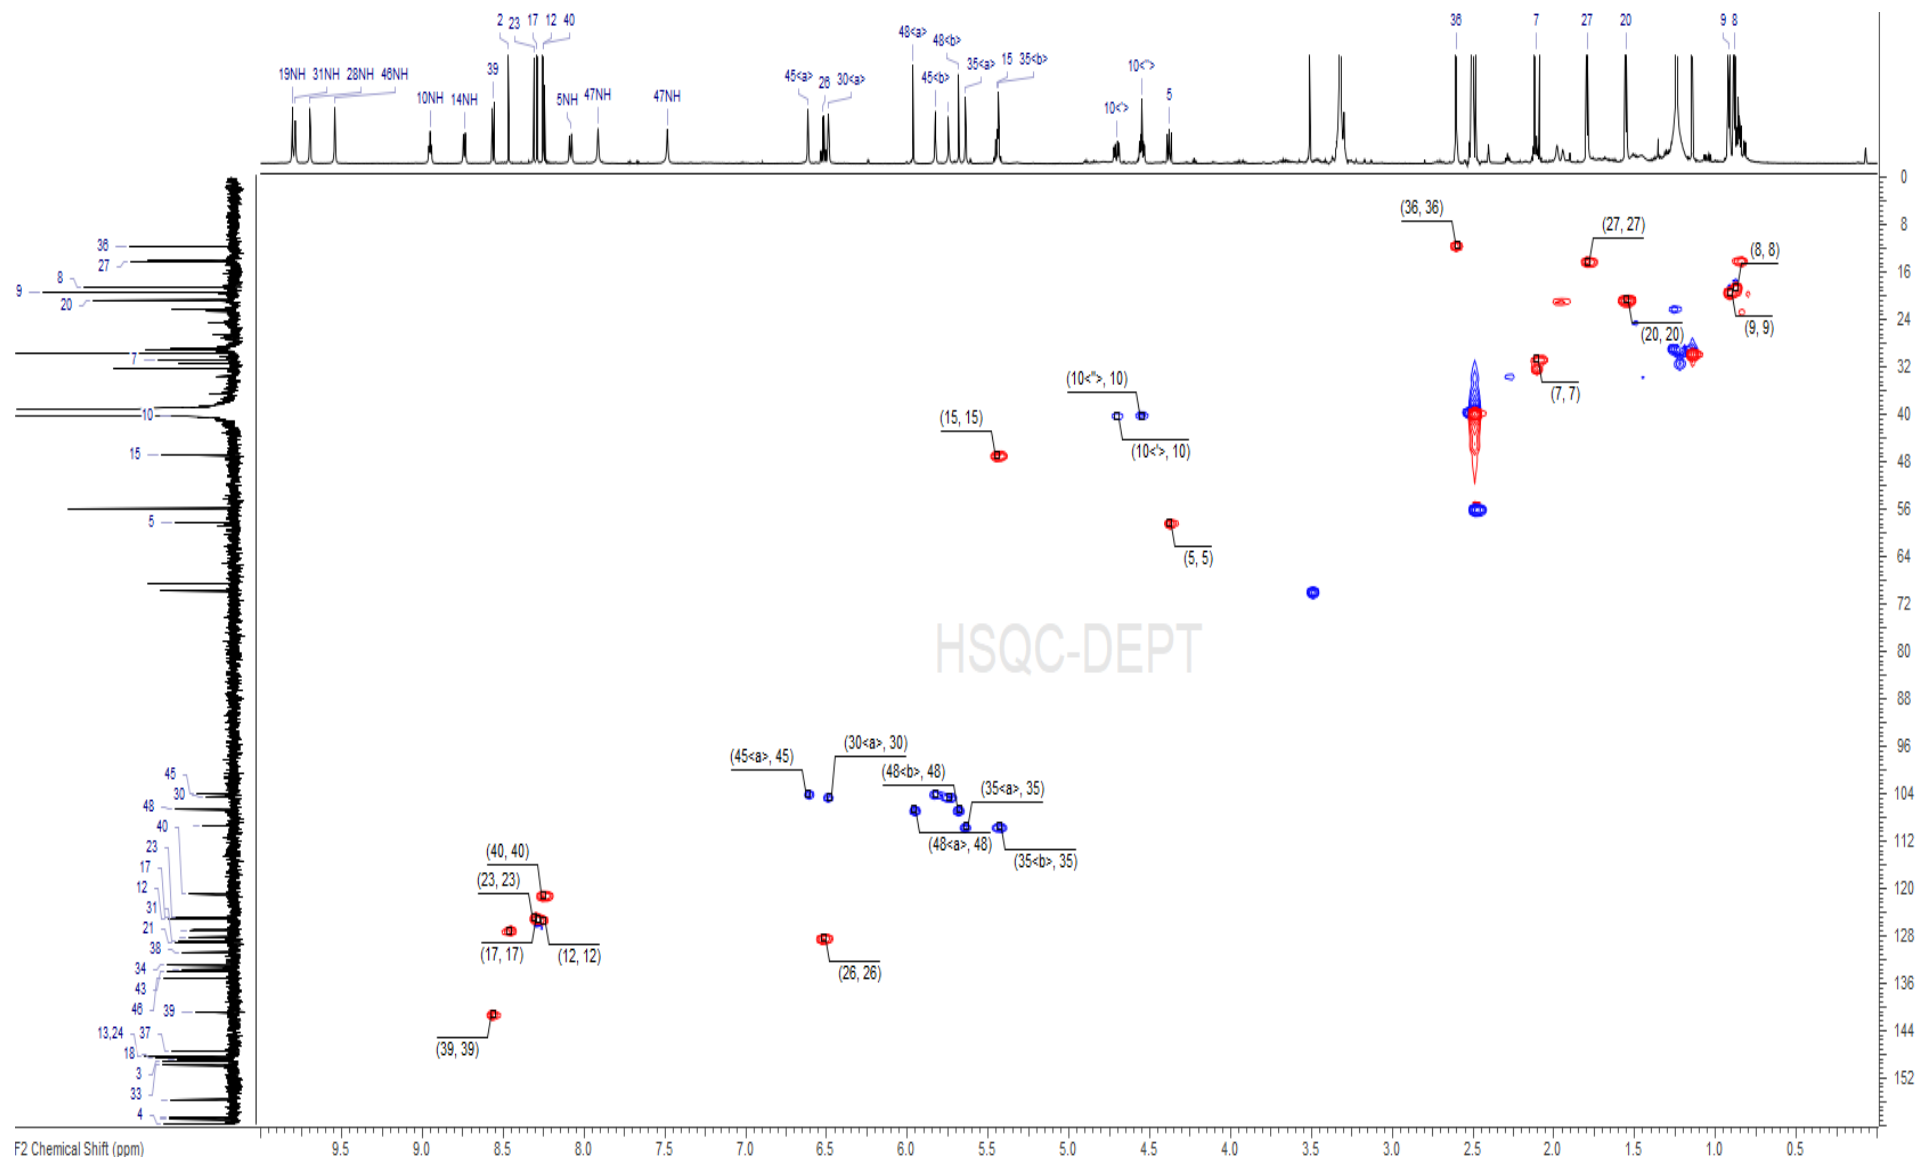

Figure S10: HSQC NMR spectrum (700 MHz, DMSO-*d*<sub>6</sub>) of litoralimycin A (**1**).

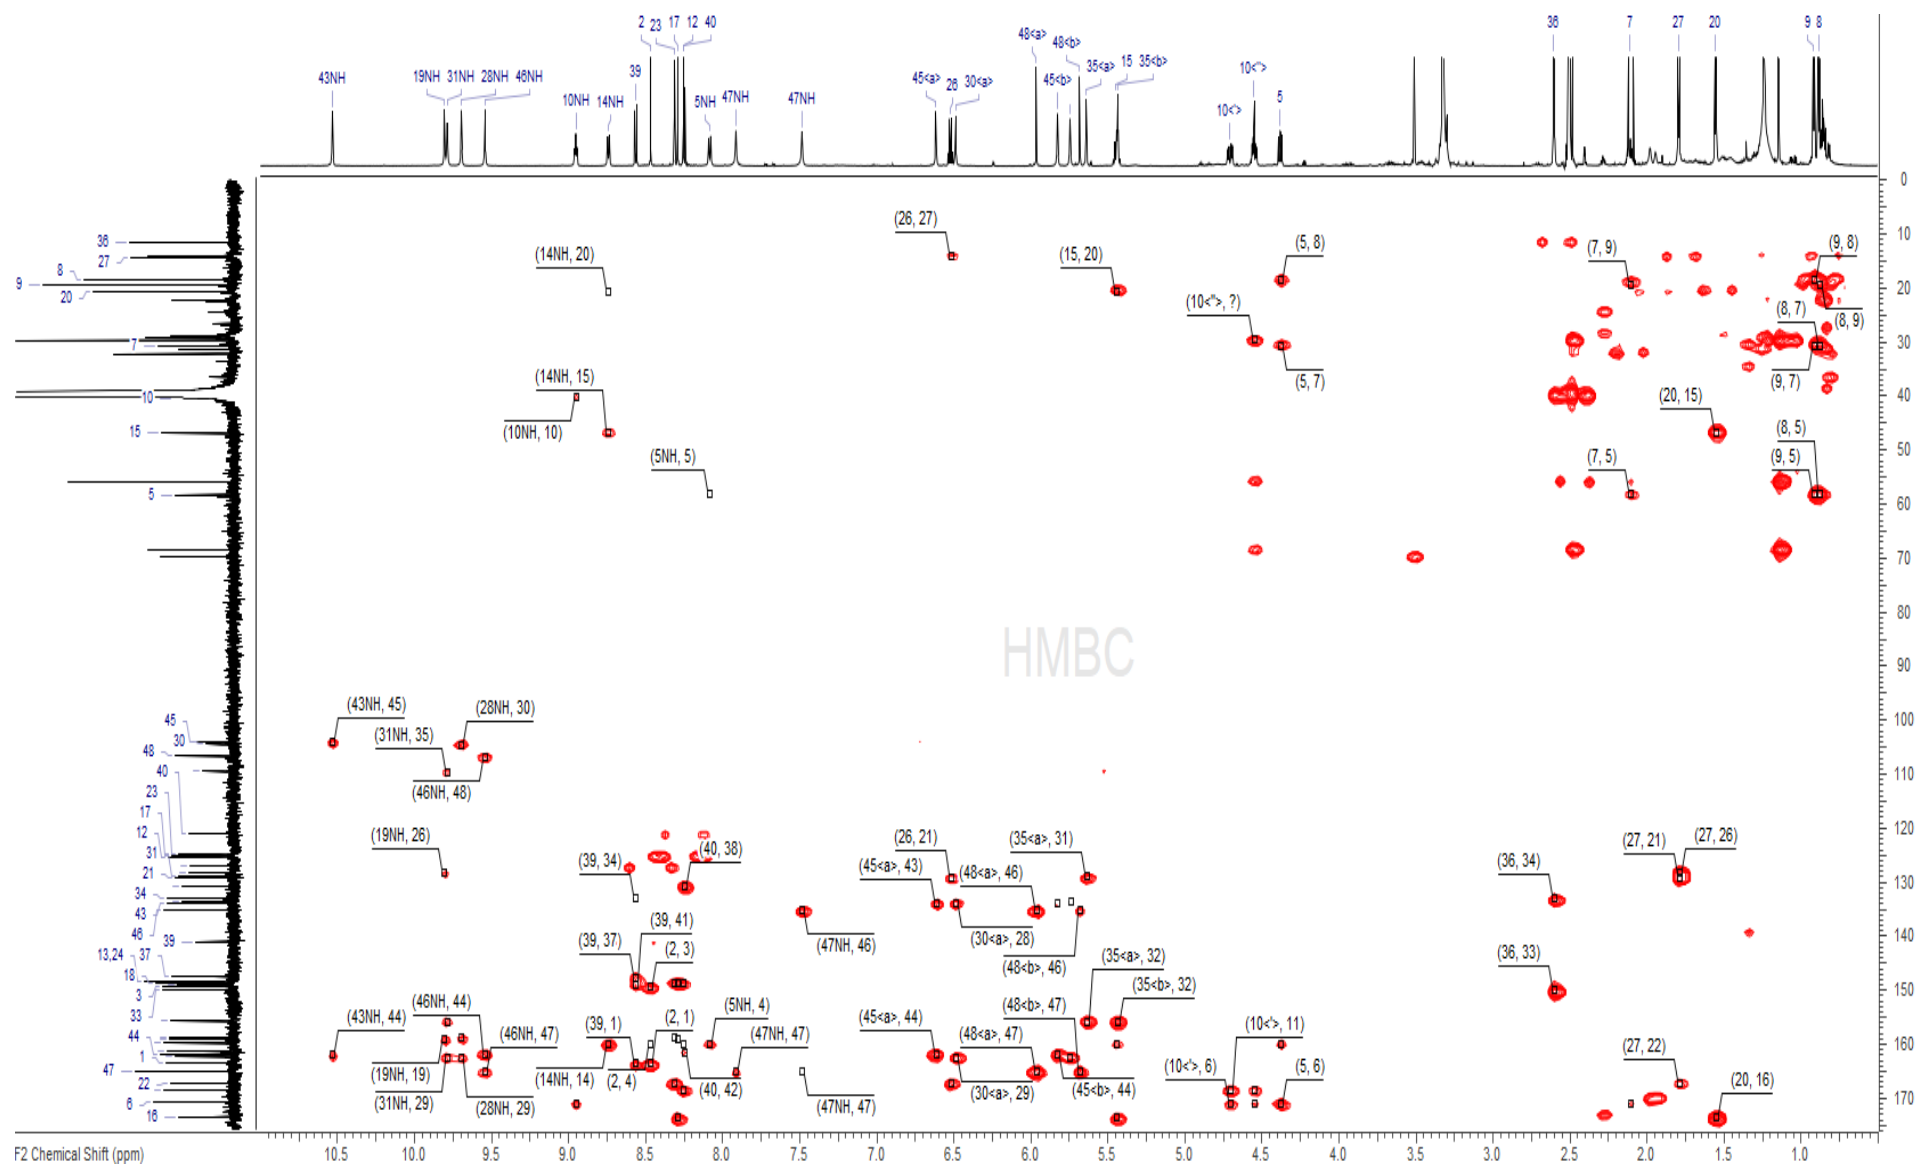

Figure S11: HMBC NMR spectrum (700 MHz, DMSO-*d*<sub>6</sub>) of litoralimycin A (**1**).

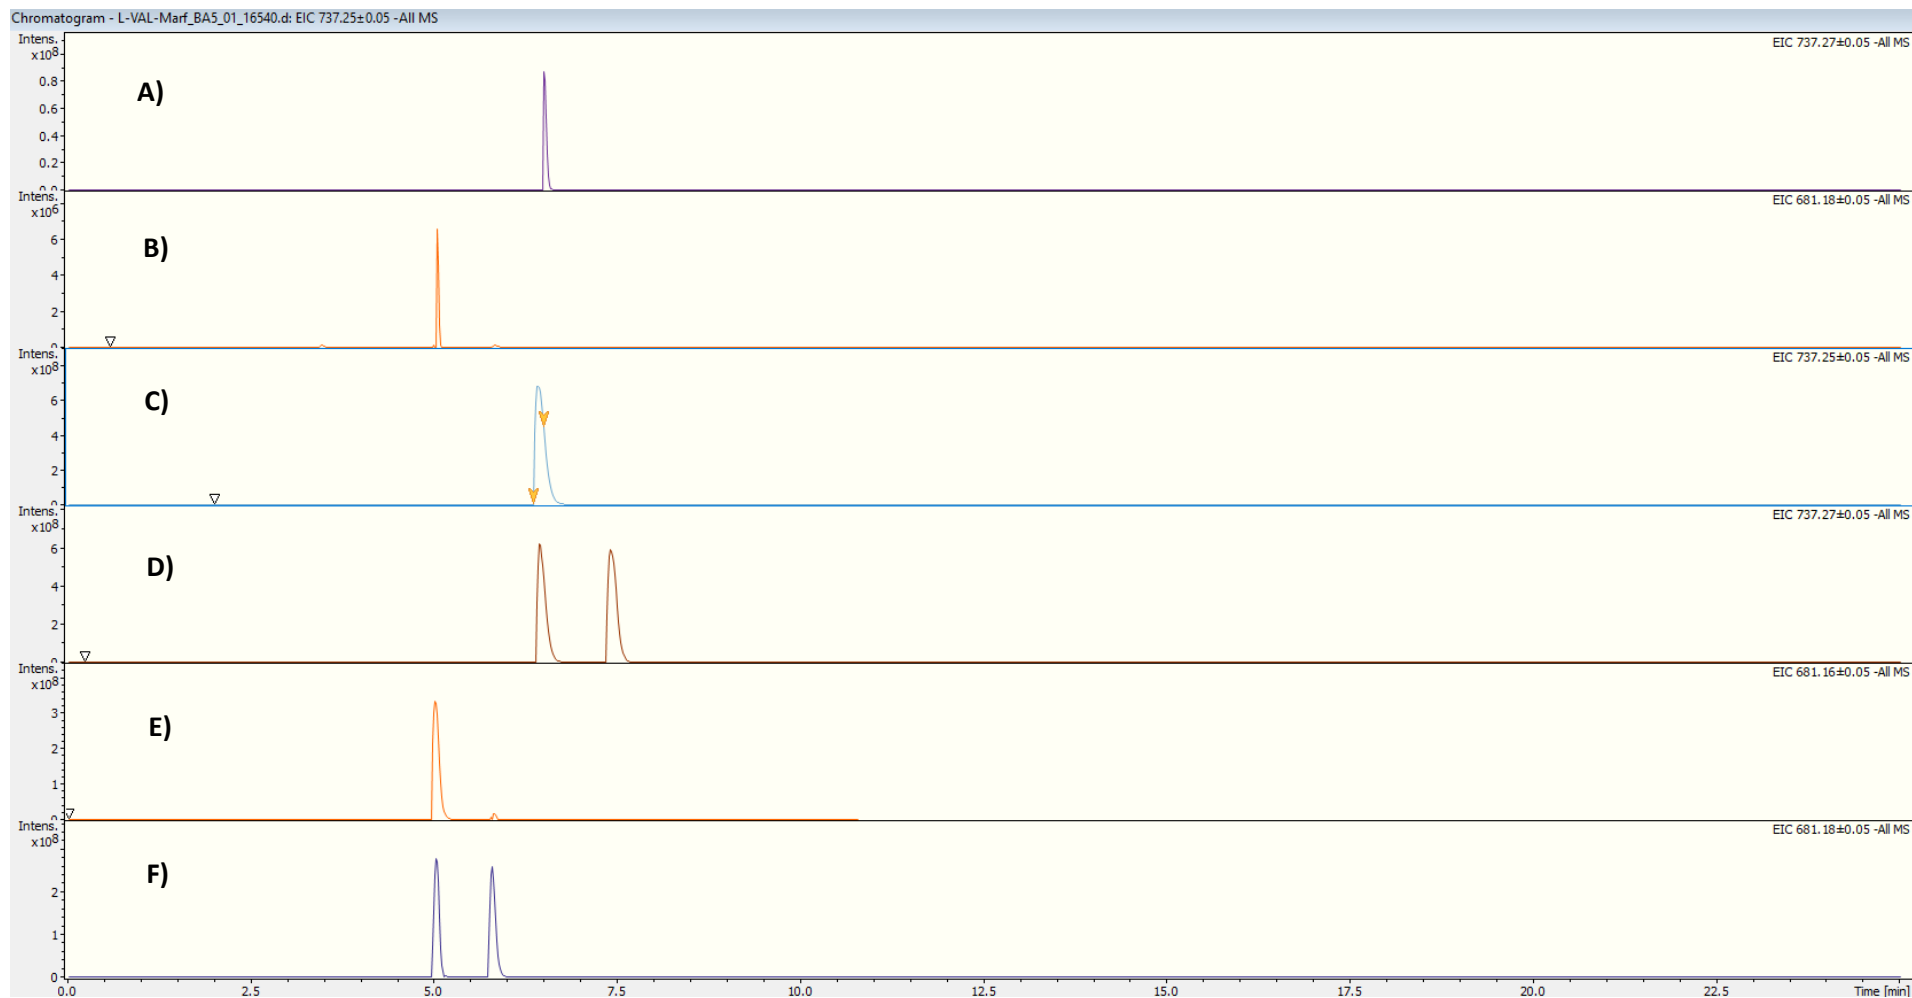

Figure S12: Marfey derivatization for determination of type and configuration of amino acids in litoralimycin A (1).

A) Detection of L-valine after ozonolysis, hydrolysis and derivatisation with FDAA; B) Detection of L-alanine after ozonolysis, hydrolysis and derivatisation with FDAA, C) FDAA derivative of L-Valin standard, D) FDAA derivative of DL-Valin standard, E) FDAA derivative of L-Alanin standard, F) FDAA derivative of DL-Alanin standard.

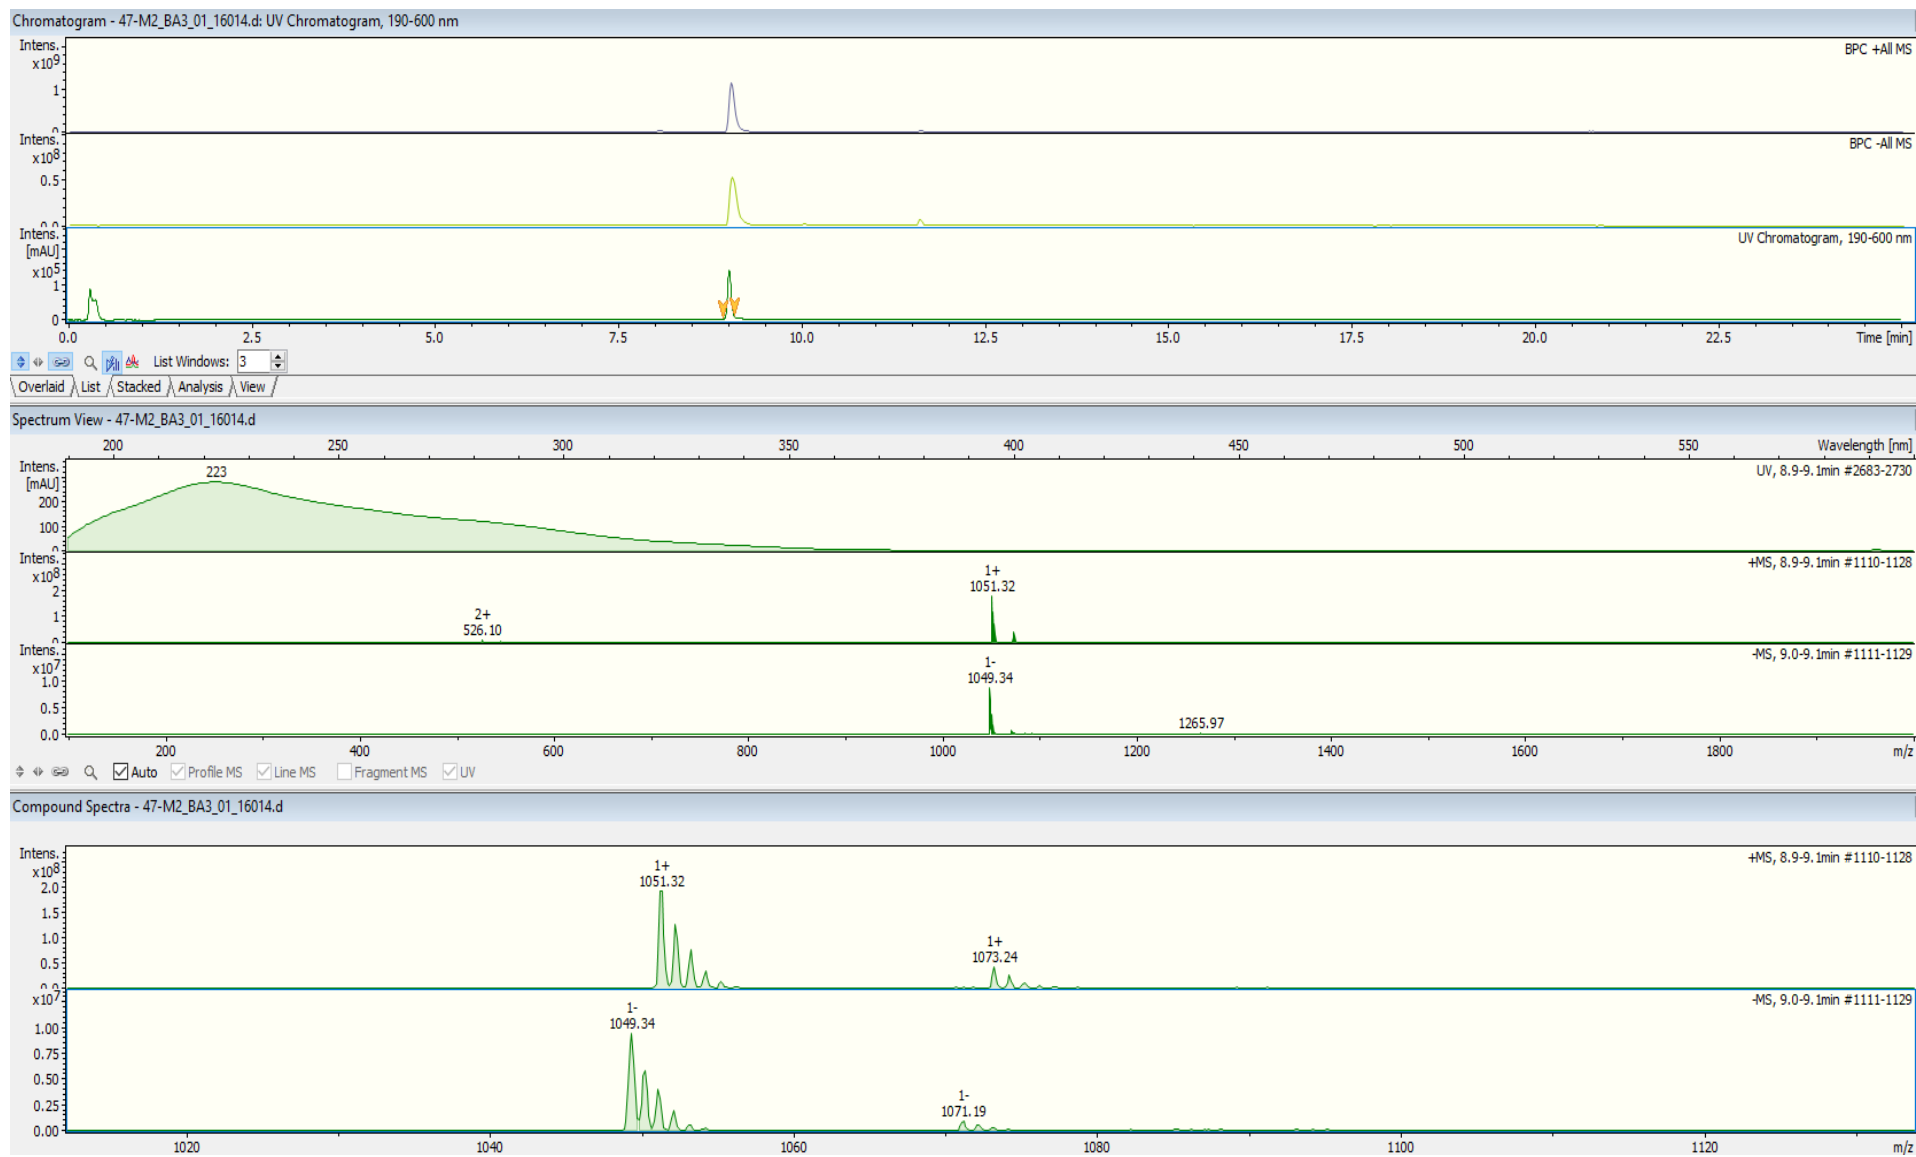

Figure S13: HPLC-ESIMS spectrum of litoralimycin B (2).

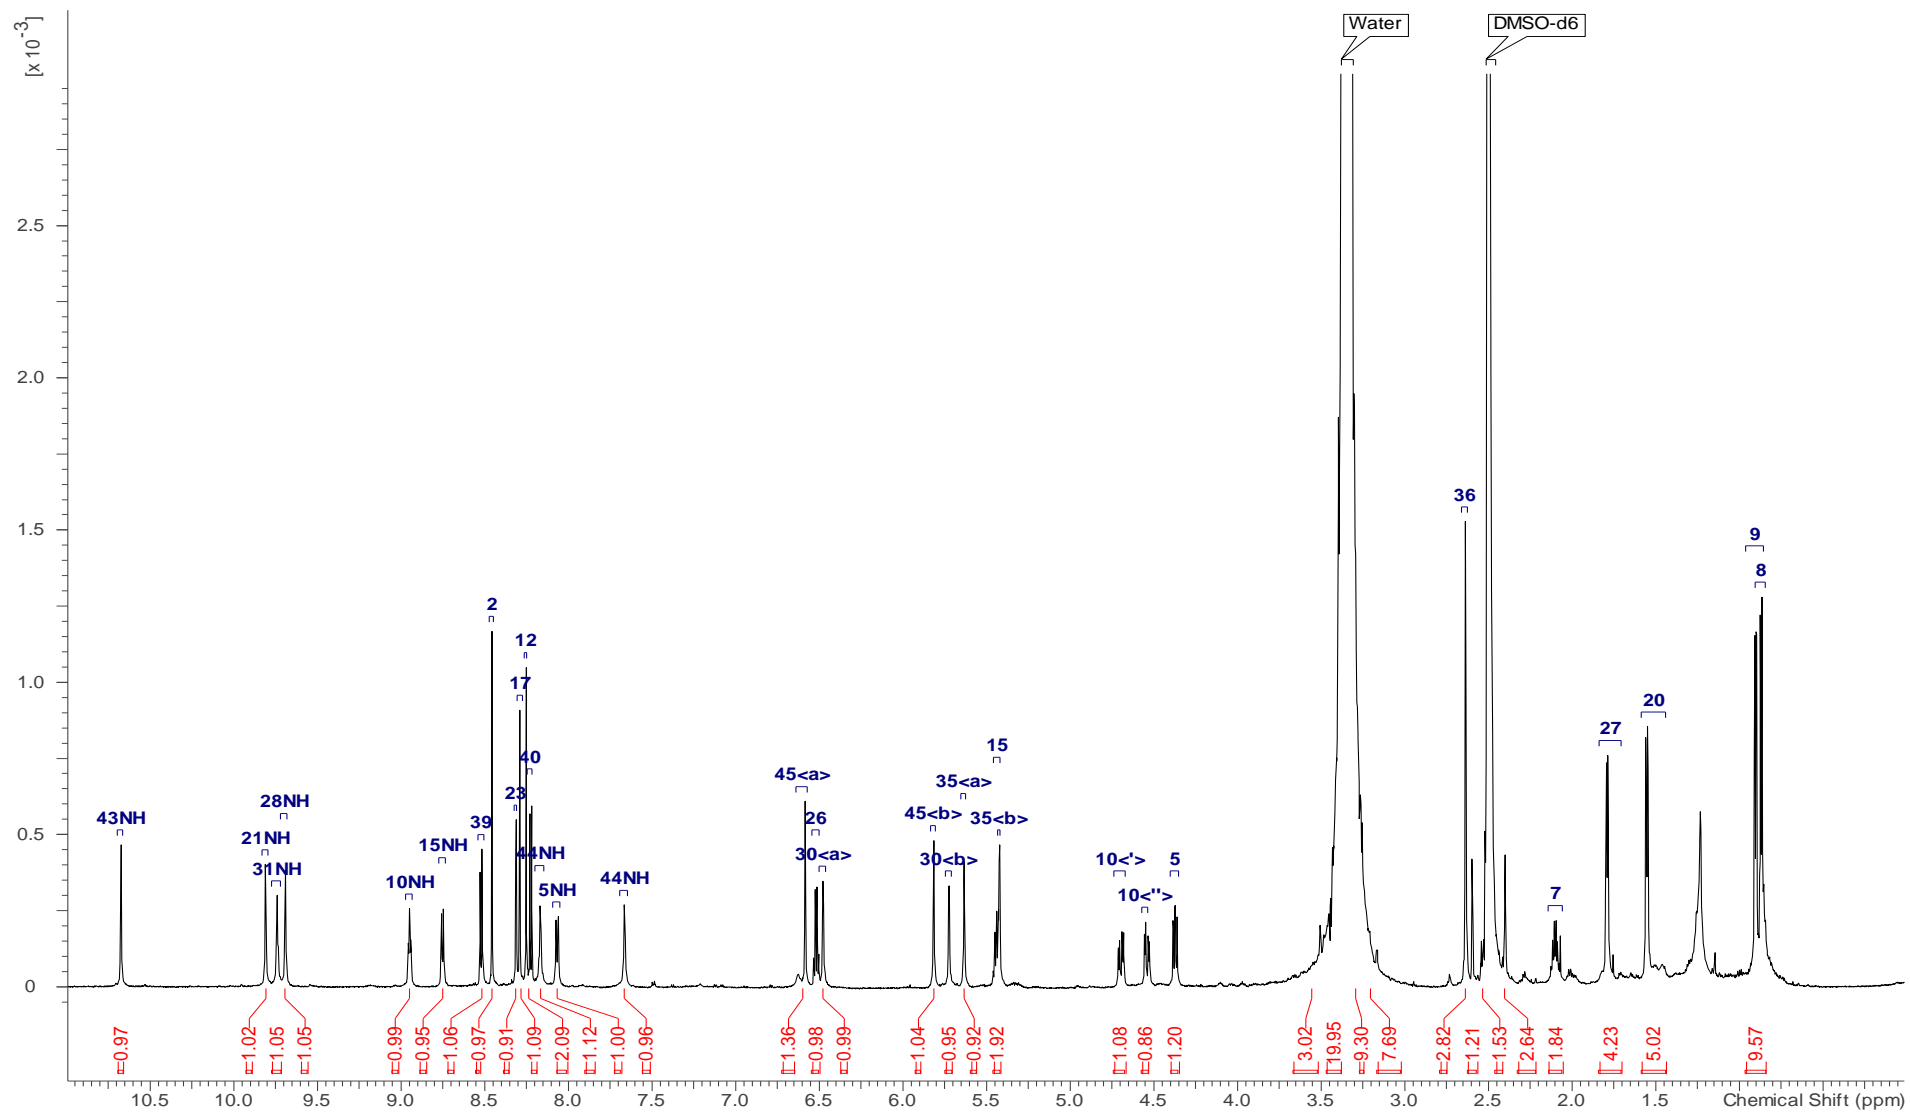

Figure S14:  $^1\text{H}$  NMR spectrum (700 MHz,  $\text{DMSO-}d_6$ ) of litoralimycin B (2).

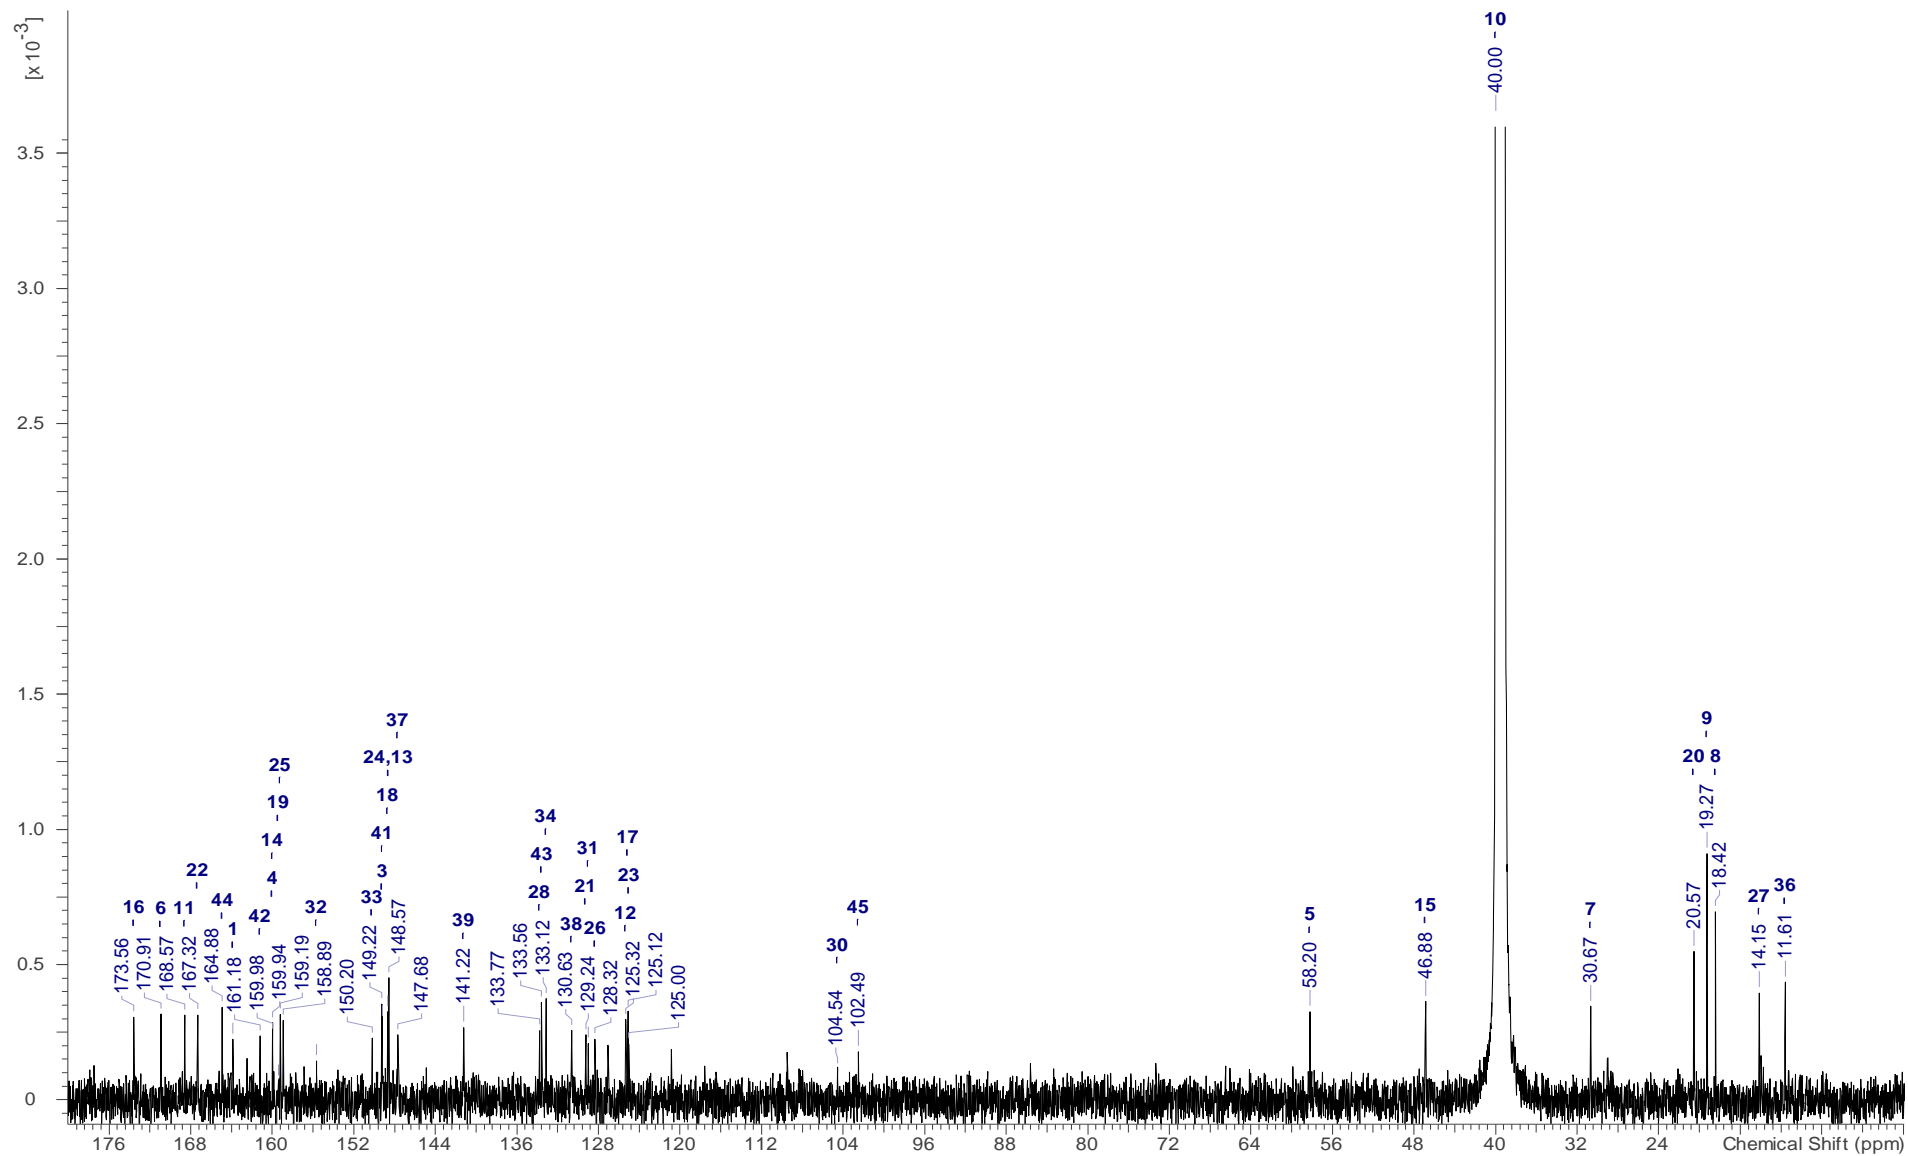

Figure S15:  $^{13}\text{C}$  NMR spectrum (175 MHz,  $\text{DMSO-}d_6$ ) of litoralimycin B (2).



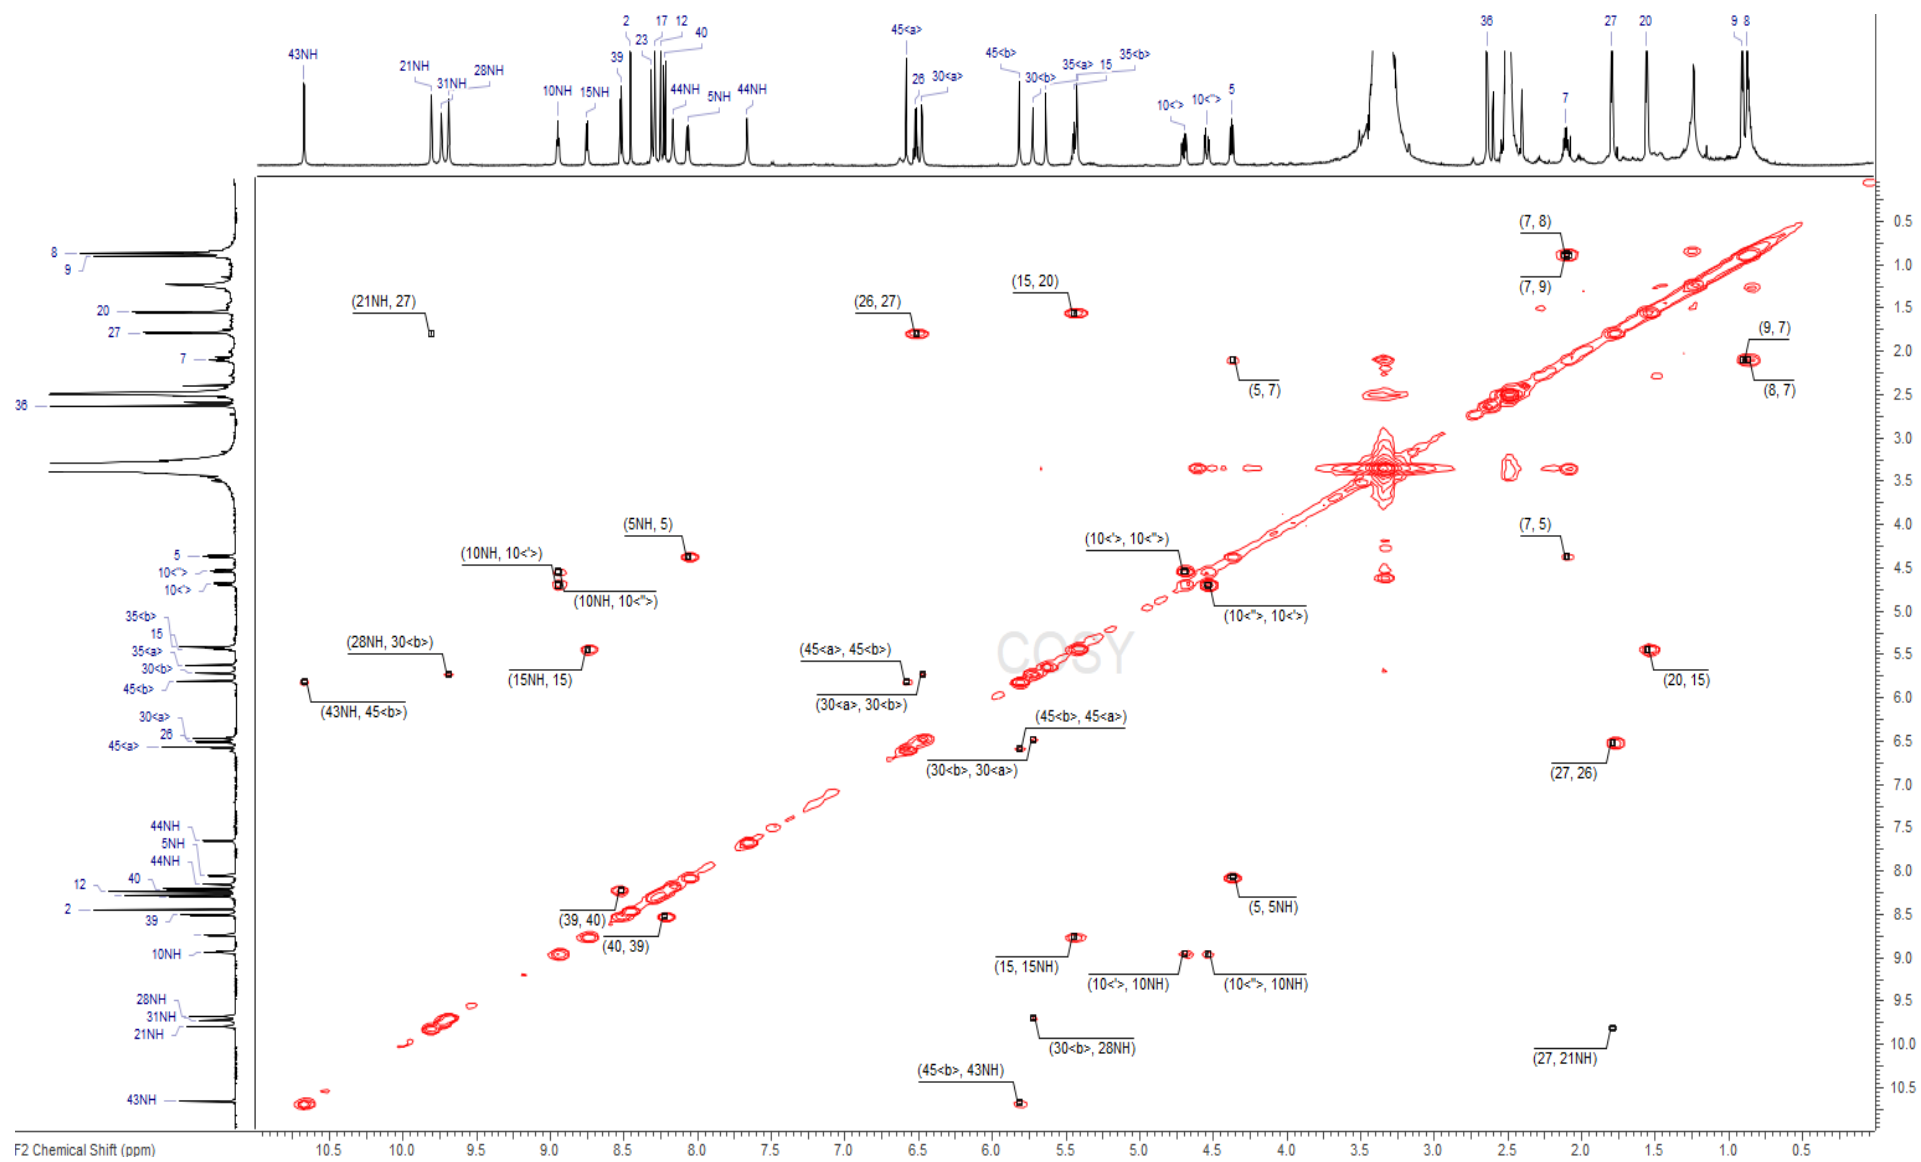

Figure S16: COSY NMR spectrum (700 MHz, DMSO-*d*<sub>6</sub>) of litoralimycin B (2).

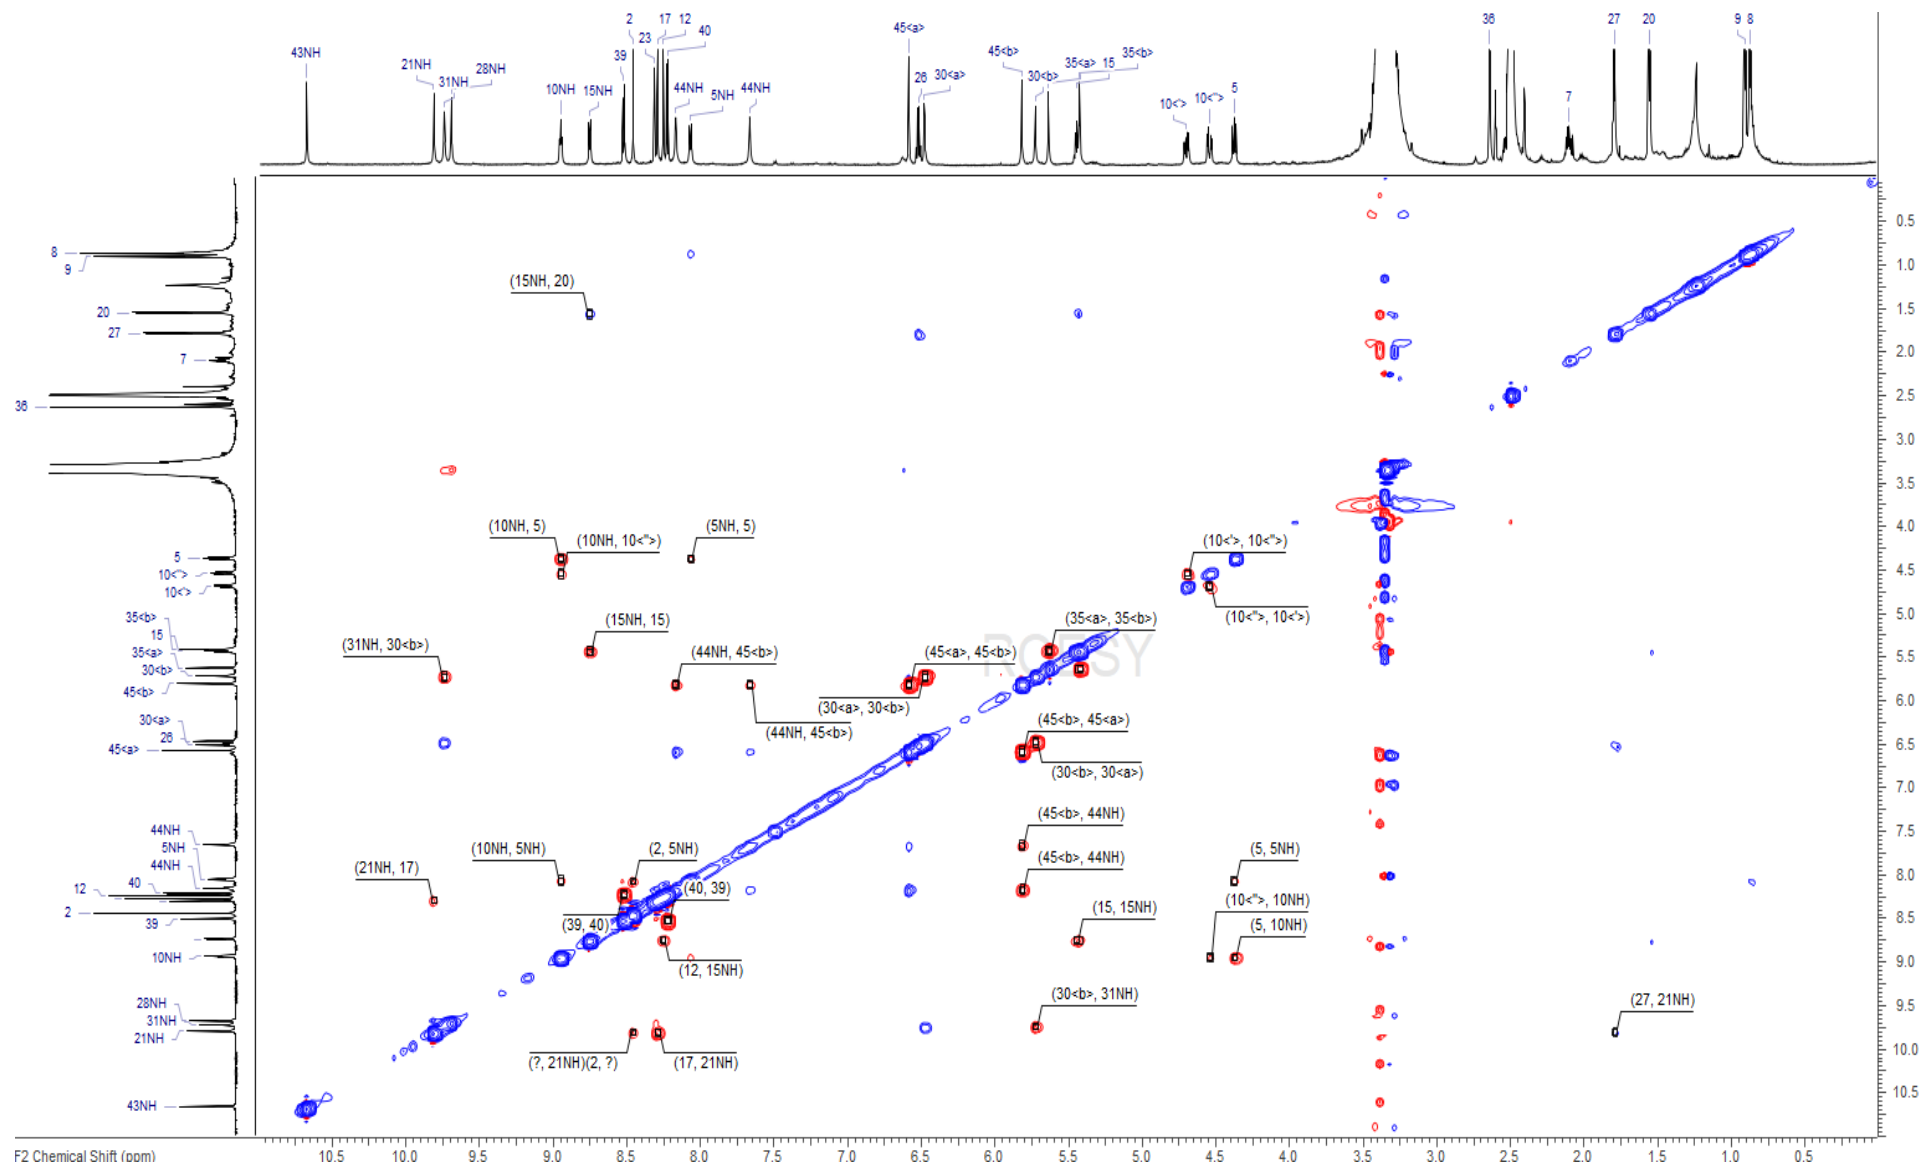

Figure S17: ROESY NMR spectrum (700 MHz, DMSO-*d*<sub>6</sub>) of litoralimycin B (2).

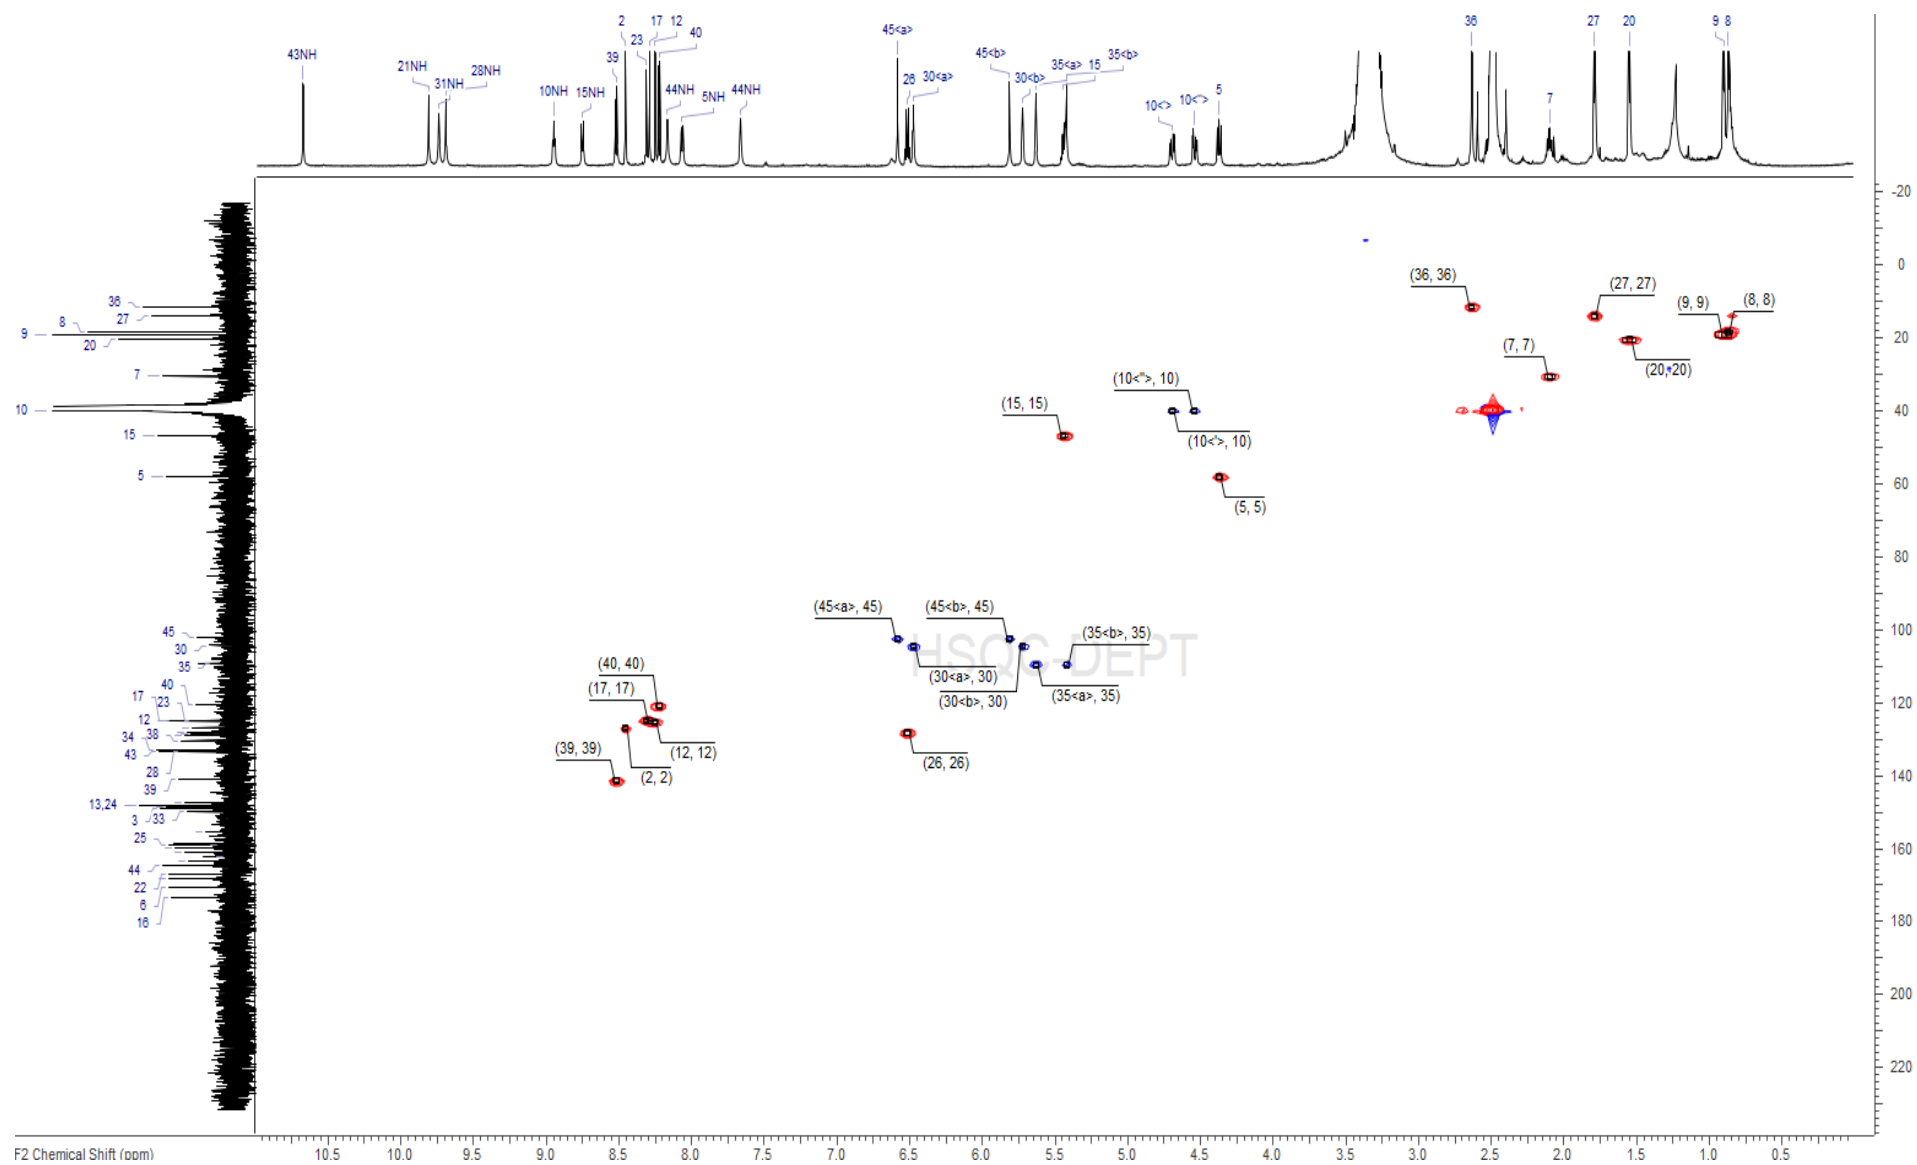

Figure S18: HSQC NMR spectrum (700 MHz, DMSO-*d*<sub>6</sub>) of litoralimycin B (2).

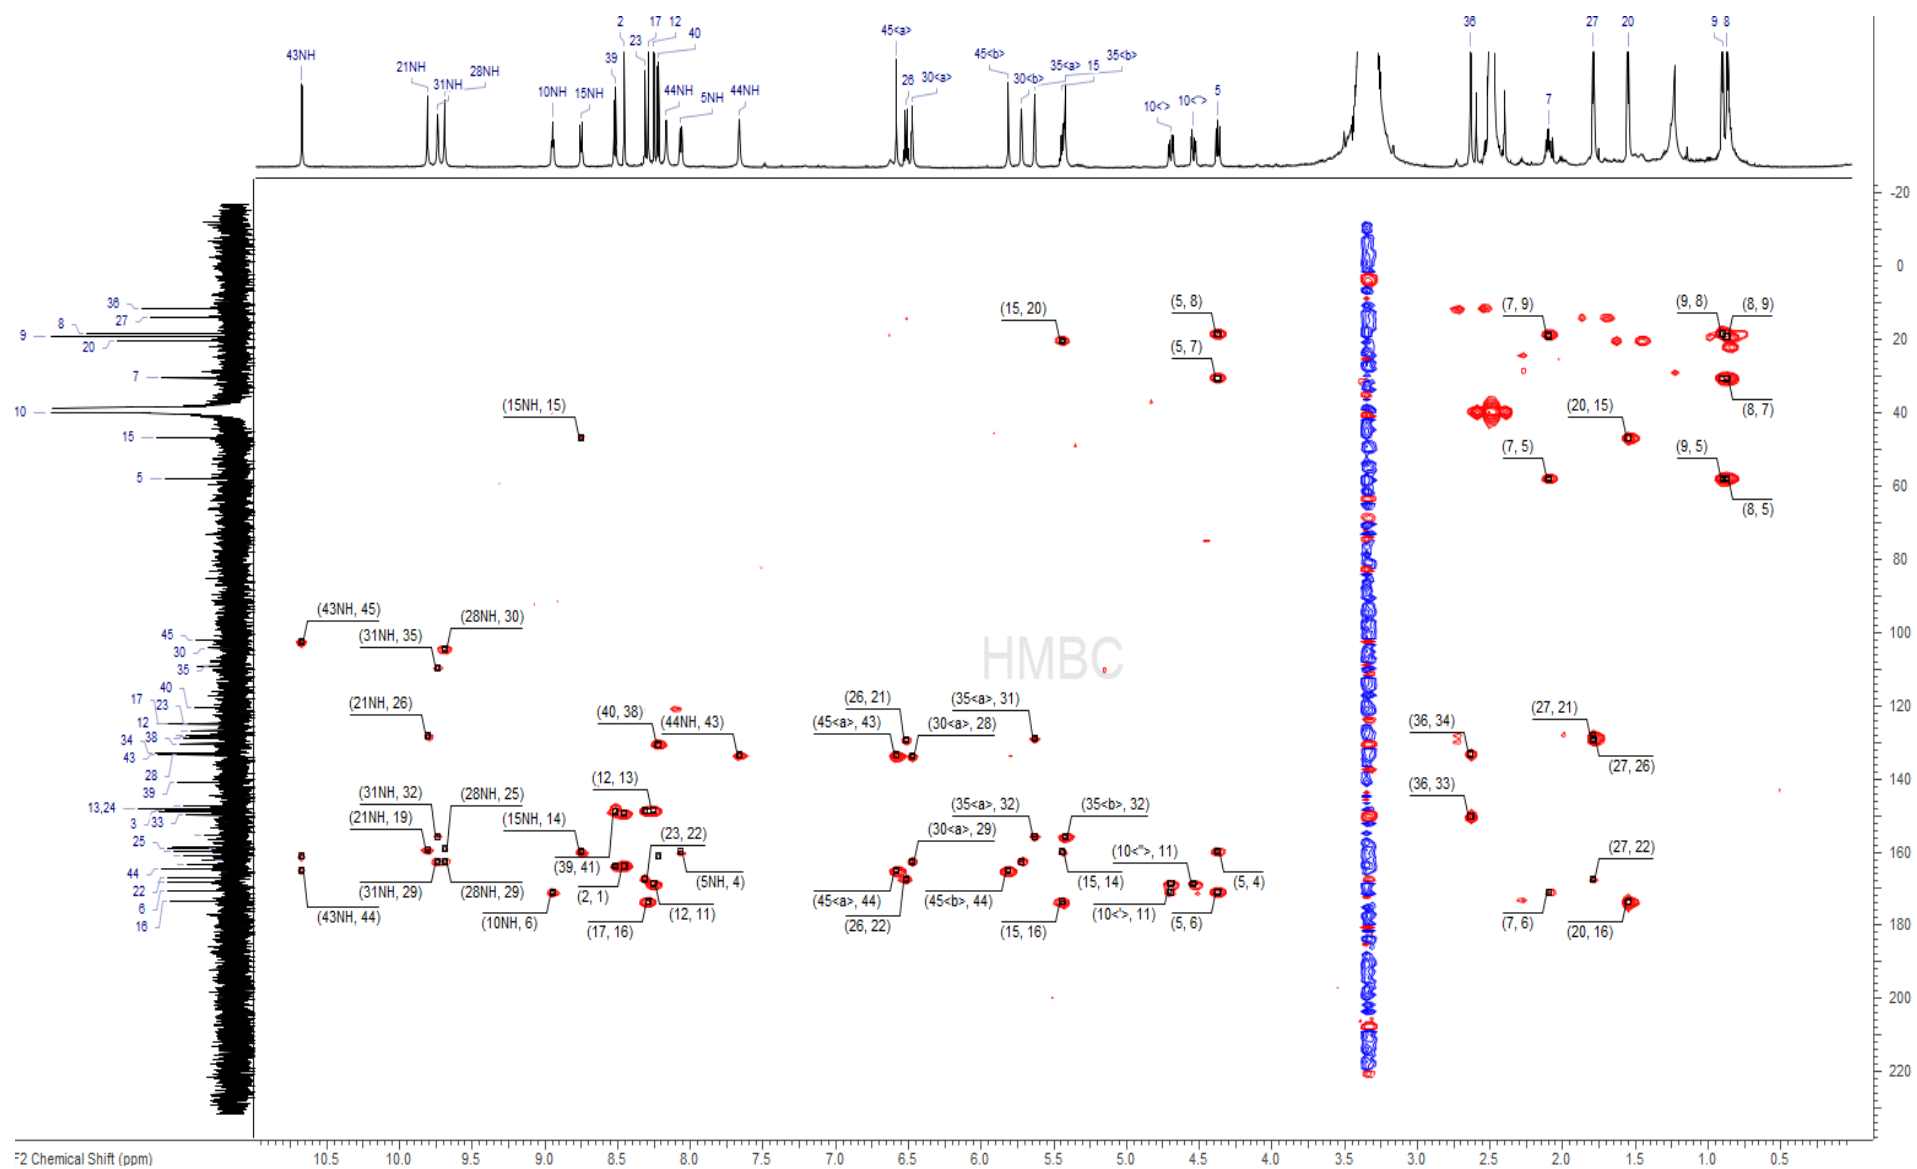

Figure S19: HMBC NMR spectrum (700 MHz, DMSO-*d*<sub>6</sub>) of litoralimycin B (**2**).

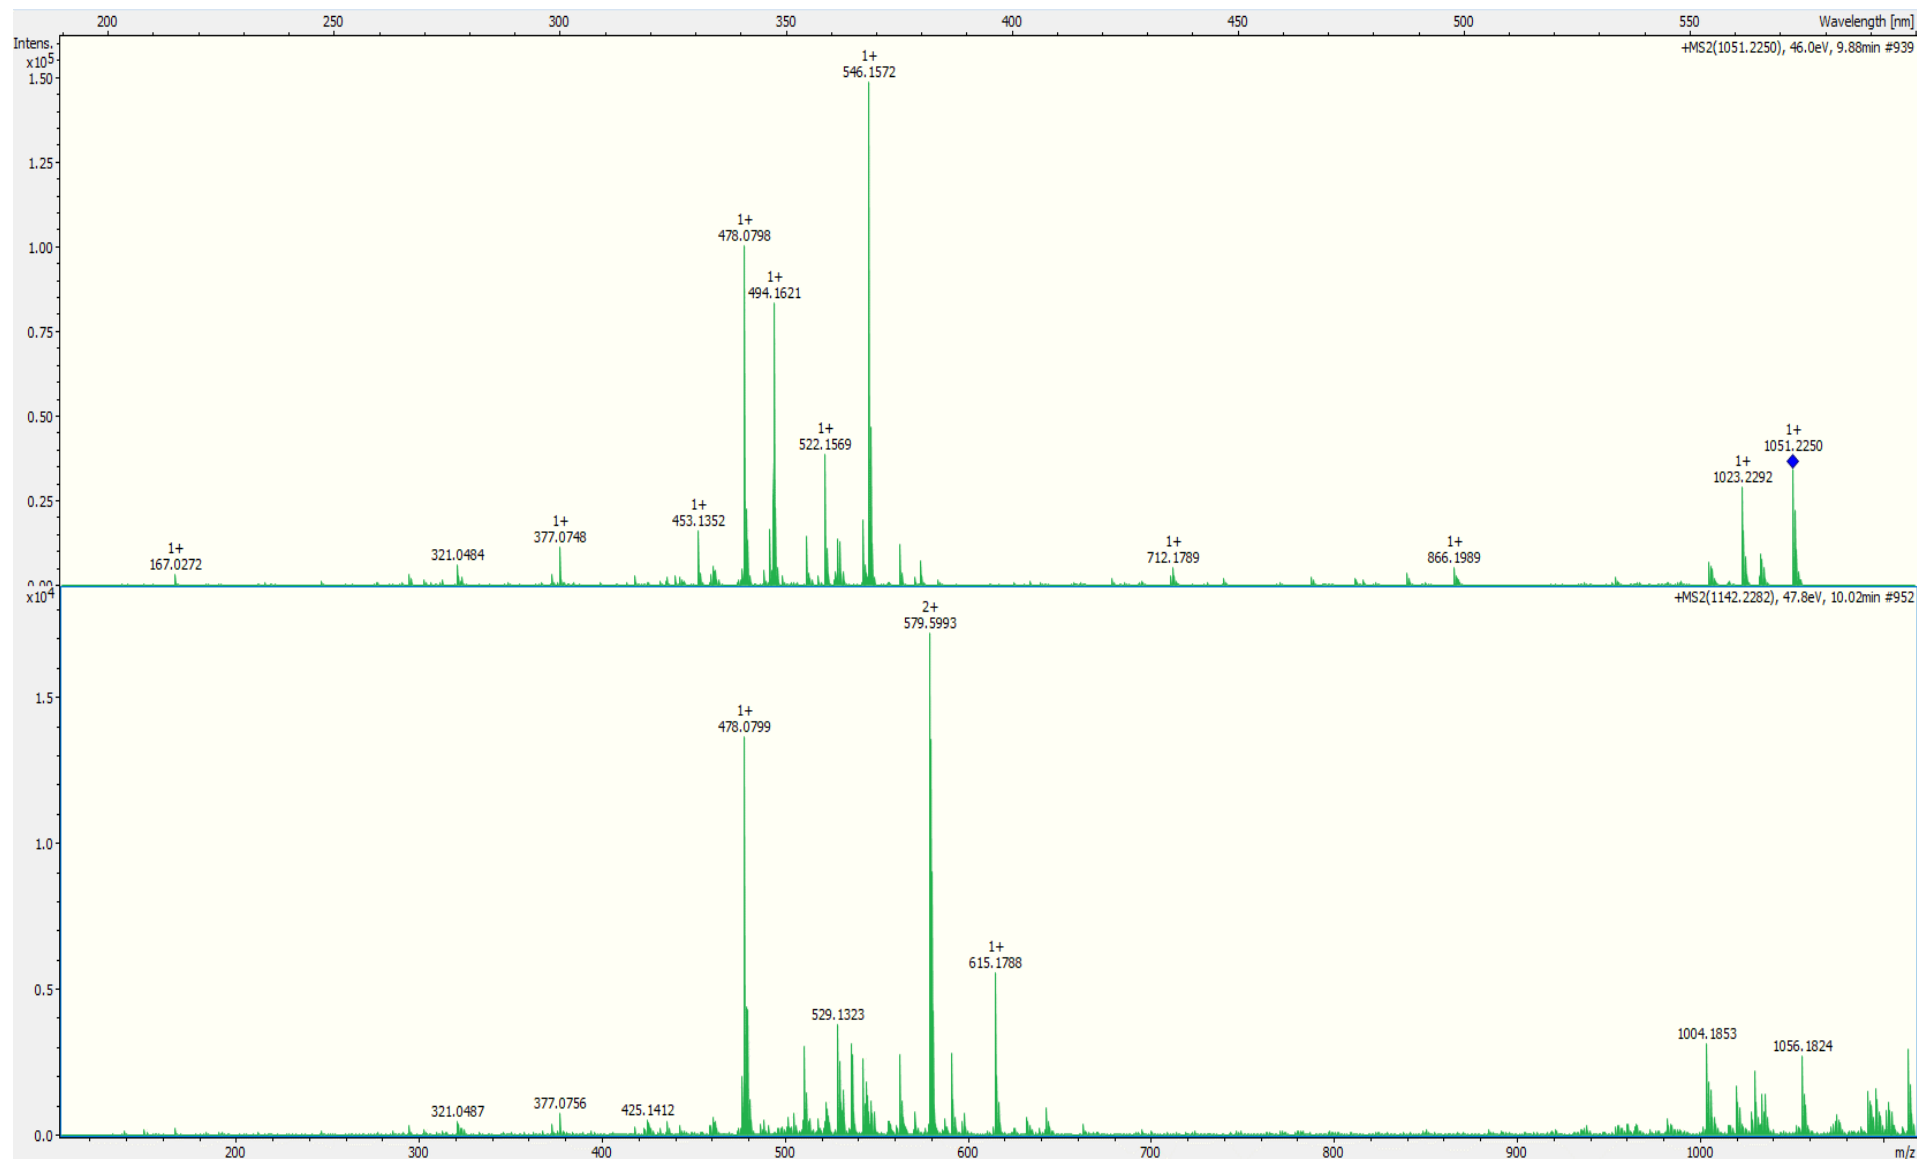

Figure 20: MS/MS data for **1** (lower part) and **2** (upper part) with fragmentation of  $[M+Na]^+$  ions at  $m/z$  1142.2282 and 1051.2250, respectively.
